# Supplementary material for: Grapevine comparative early transcriptomic profiling suggests that Flavescence dorée phytoplasma represses plant responses induced by vector feeding in susceptible varieties
Source: BMC Genomics. 2019 Jun 26;20:526. doi: 10.1186/s12864-019-5908-6 (PMC6595628; doi:10.1186/s12864-019-5908-6)

1) Venn diagrams of genes differentially expressed between the two grapevine cultivars at 3 and 6 days after HSt and FDSSt attacks. Venn diagrams illustrating the relationship between the DEGs detected at 3 and 6 days post infestation in HSt (**A on the top**) and FDSSt (**B on the top**) and the overlap between up-regulated and down-regulated DEGs (**A and B on the bottom**).

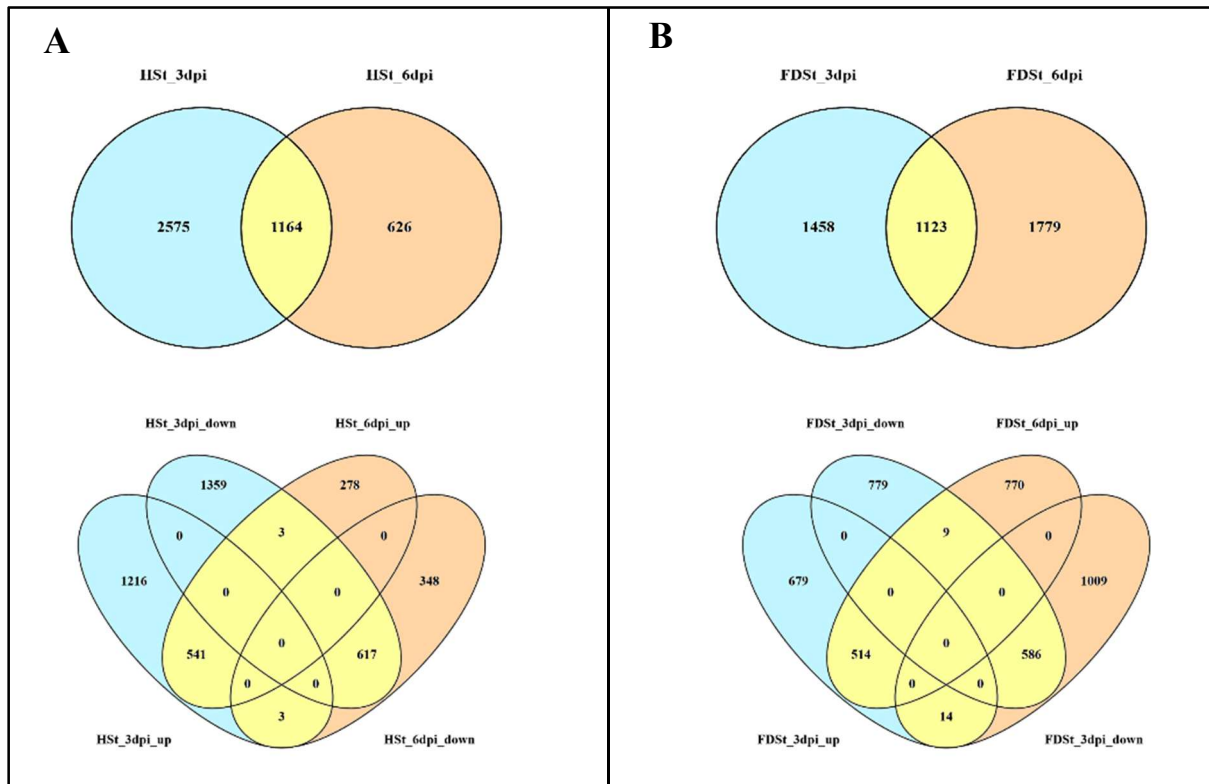

2) Venn diagrams of genes genes differentially expressed between the two grapevine cultivars after HSt and FDSSt attacks at two time points. Venn diagrams illustrating the relationship between the DEGs modulated after HSt and FDSSt attacks at 3 (**A on the top**) and 6 days post infestation (**B on the top**) and the overlap between up-regulated and down-regulated DEGs (**A and B on the bottom**).

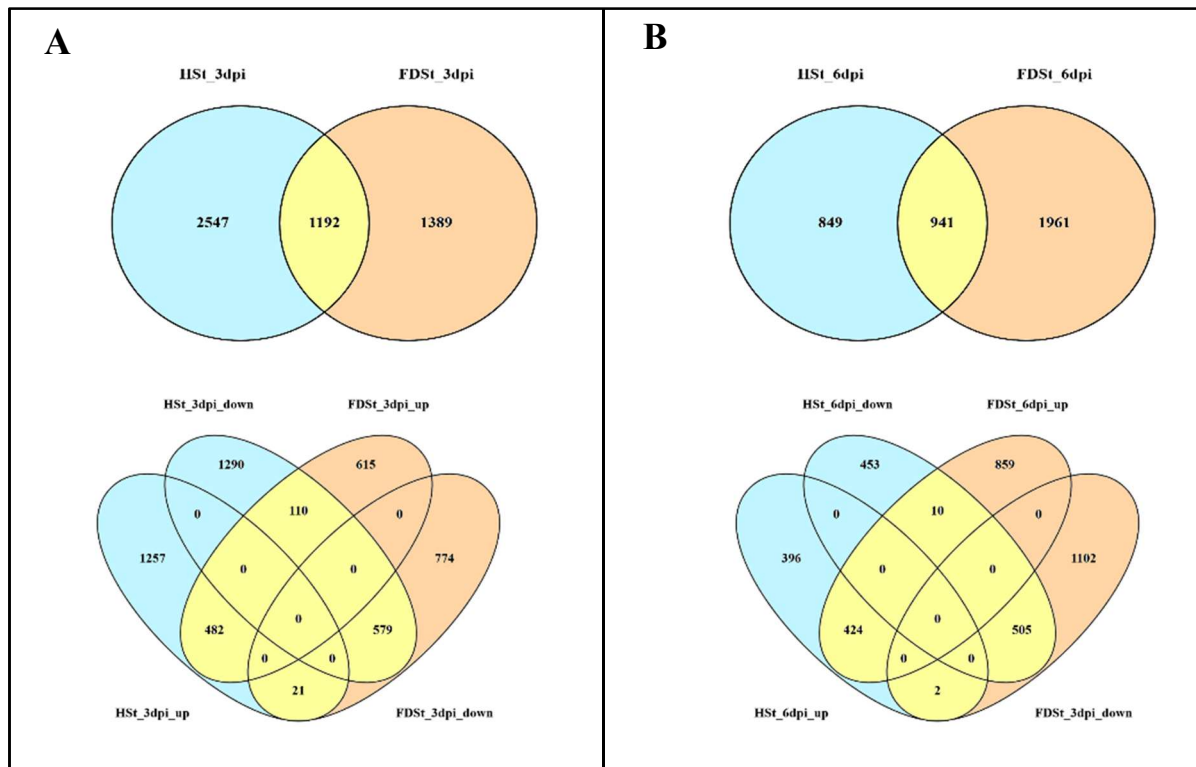

**A**

HSt\_3dpi HSt\_6dpi

1586 70 456

HSt\_3dpi\_down HSt\_6dpi\_up

931 655 146 0 6 0 0 0 0 0 8 0 0 18 38 0

HSt\_3dpi\_up HSt\_6dpi\_down

**B**

FDSt\_3dpi FDSt\_6dpi

380 80 1391

FDSt\_3dpi\_down FDSt\_6dpi\_up

206 174 757 0 4 0 0 0 0 0 34 0 0 40 2 0

FDSt\_3dpi\_up FDSt\_6dpi\_down

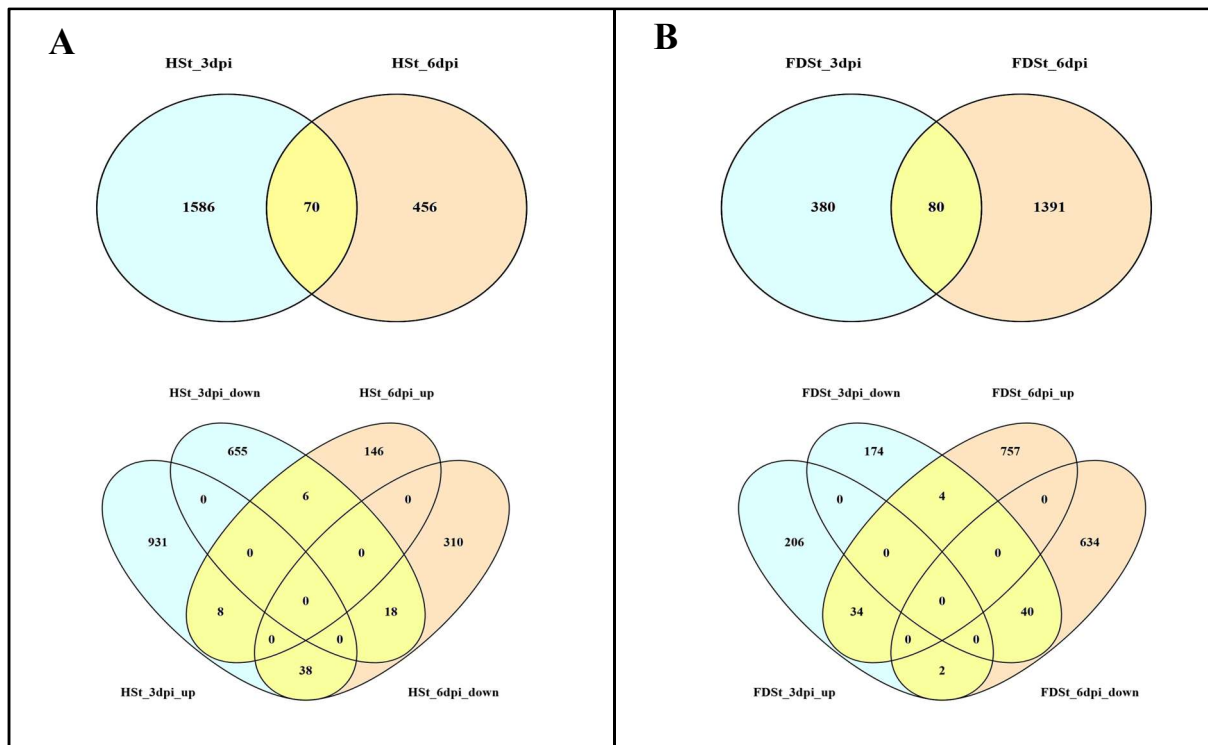

**Venn diagrams of genes modulated after HSt and FdSt attacks in Chardonnay at two time points.** Venn diagrams illustrating the relationship between the DEGs modulated after HSt and FdSt attacks at 3 (**A on the top**) and 6 days post infestation (**B on the top**) and the overlap between up-regulated and down-regulated DEGs (**A and B on the bottom**).

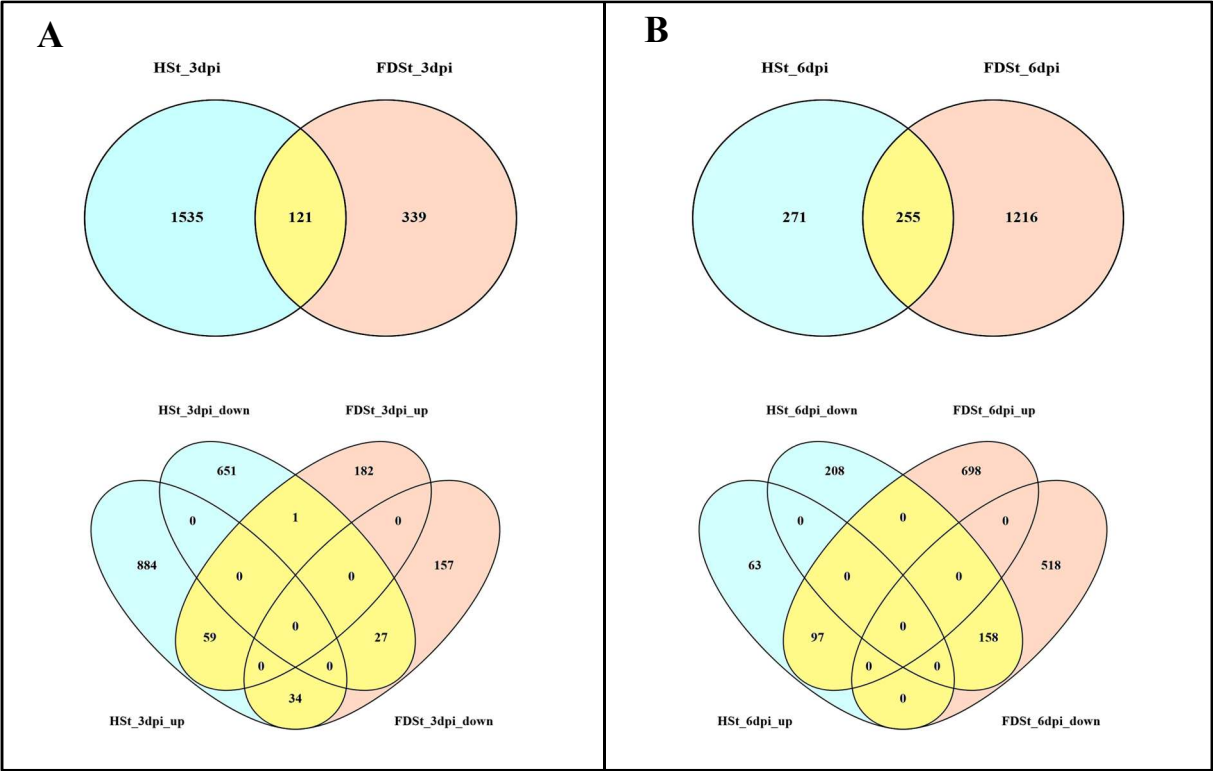

**4) Venn diagrams of genes modulated at 3 and 6 days after HSt and FDSSt attacks in Tocaï friulano.** Venn diagrams illustrating the relationship between the DEGs detected at 3 and 6 days post infestation in HSt (**A on the top**) and FDSSt (**B on the top**) and the overlap between up-regulated and down-regulated DEGs (**A and B on the bottom**).

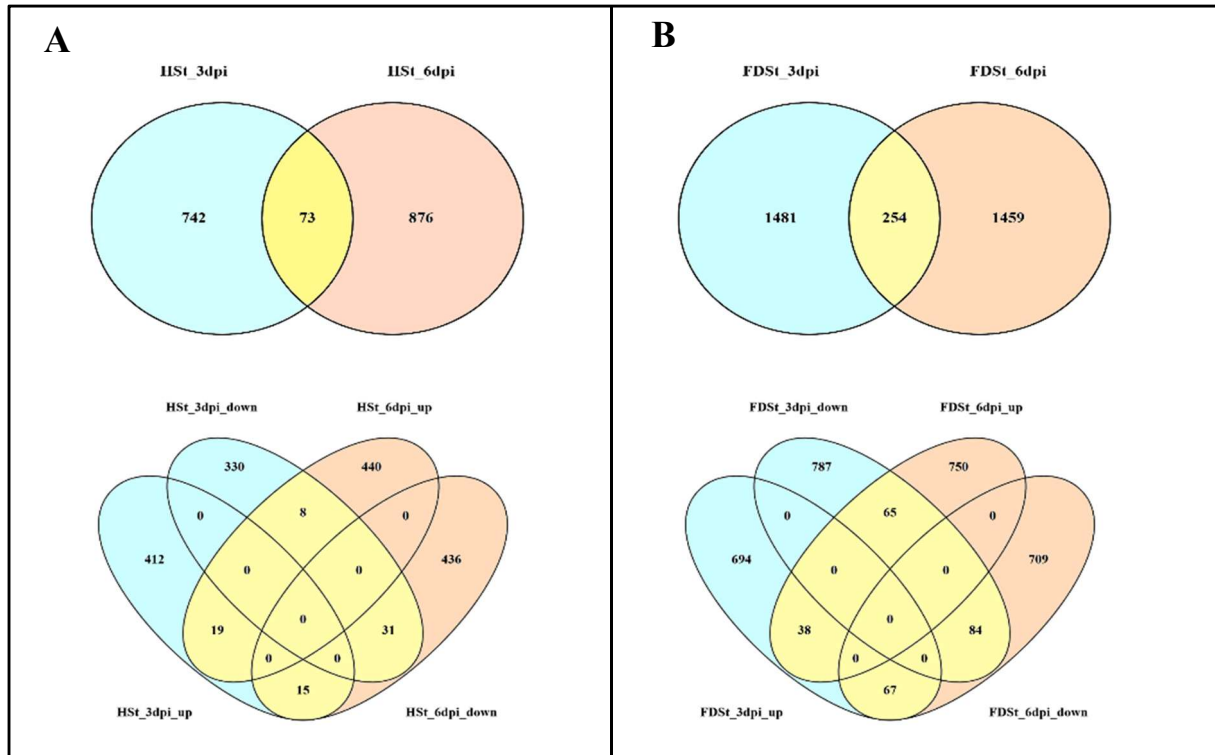

**5) Venn diagrams of genes modulated after HSt and FDSSt attacks in Tocai friulano at two time points.** Venn diagrams illustrating the relationship between the DEGs modulated after HSt and FDSSt attacks at 3 (A on the top) and 6 days post infestation (B on the top) and the overlap between up-regulated and down-regulated DEGs (A and B on the bottom).

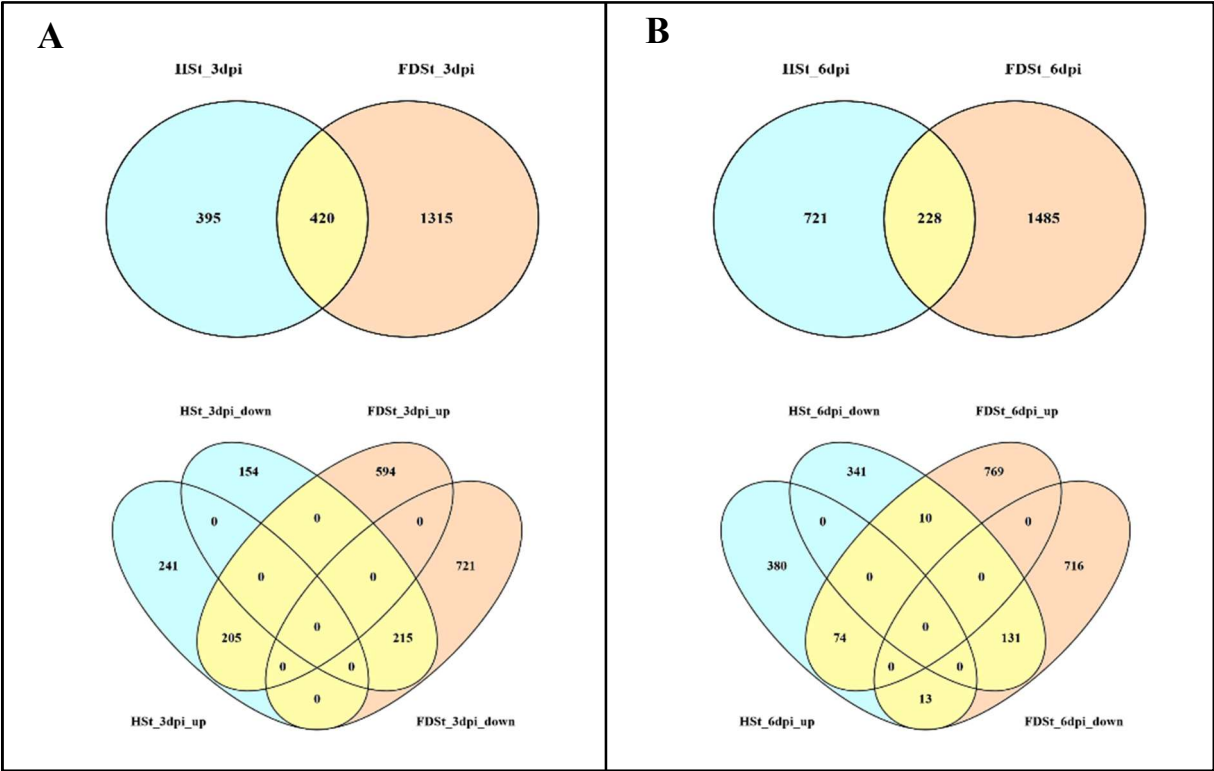

Supplement: Supplementary file 17 — Venn diagrams illustrating the relationship between the DEGs in the different treatments and the overlap between up-regulated and down-regulated DEGs. Twenty Venn diagrams are reported, grouped in five different figures; each figure includes two pairwise comparisons on the top, and the overlap between up-regulated and down-regulated DEGs on the bottom. (PDF 791 kb) [file 12864_2019_5908_MOESM17_ESM.pdf]
