# Supplementary material for: Grapevine comparative early transcriptomic profiling suggests that Flavescence dorée phytoplasma represses plant responses induced by vector feeding in susceptible varieties
Source: PubMed Central journal article supplement (PMC6595628; doi:10.1186/s12864-019-5908-6), 2019-06-26

# A) Signaling pathways

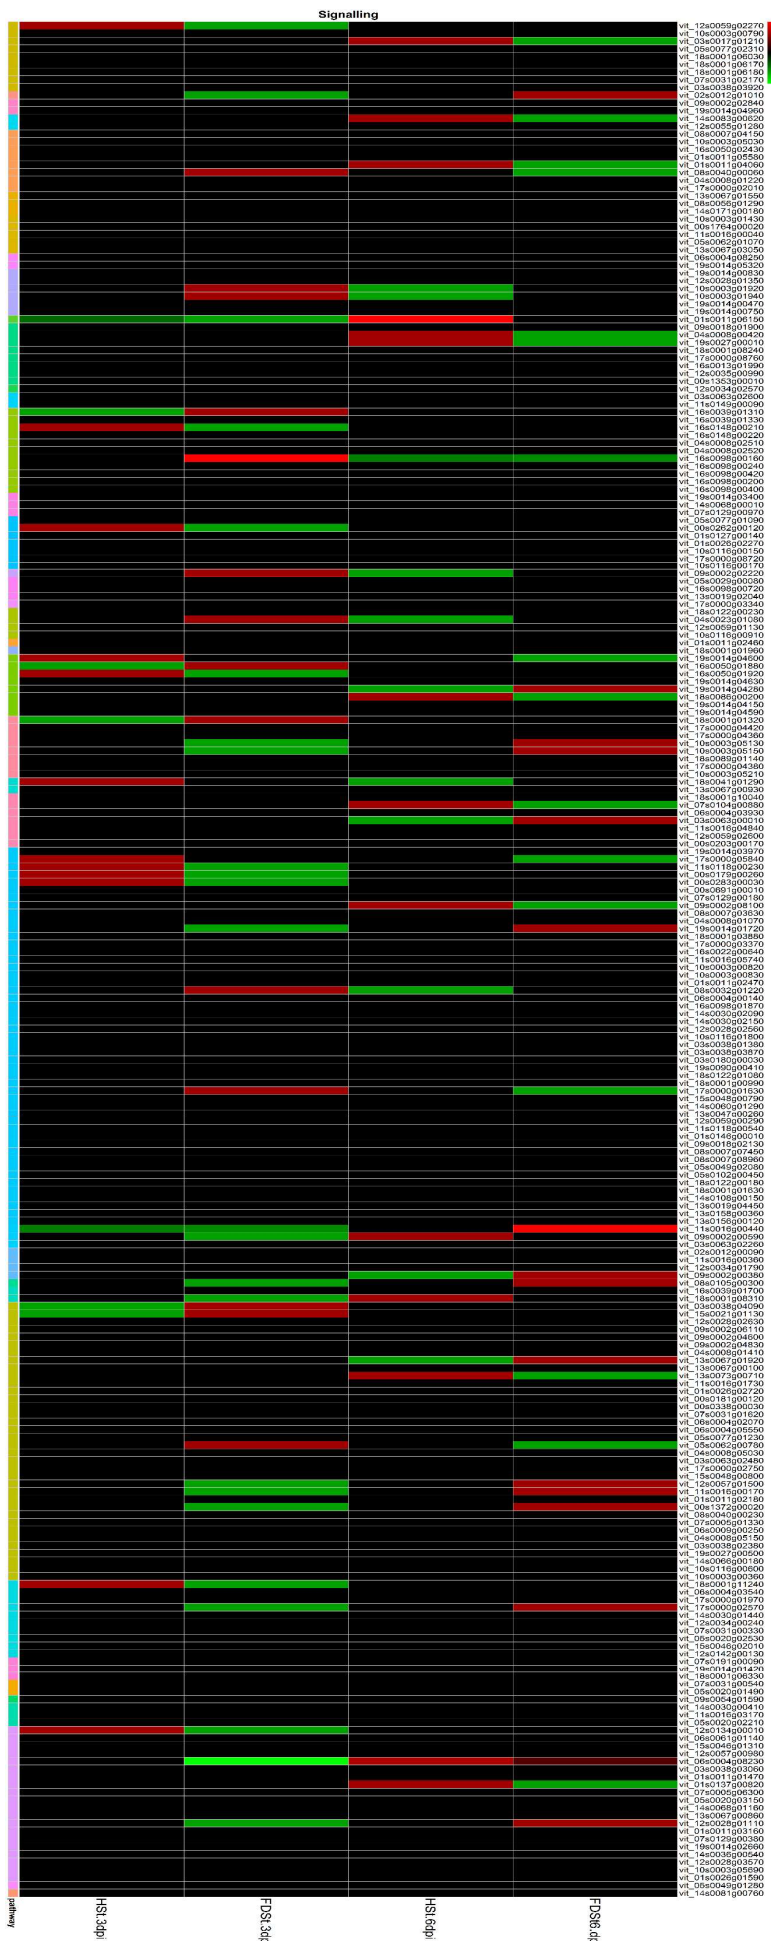

- 1 pathway
- 0.5 signalling 14-3-3 proteins
- 0 signalling calcium
- 0 signalling G-proteins
- 0.5 signalling in sugar and nutrient physiology
- 1 signalling light
- signalling light-CCP9 signalosome
- signalling lipids
- signalling MAP kinases
- signalling msc
- signalling phosphoinositides
- signalling phosphoinositides.inositol-1,3,4-trisphosphate 5/6-kinase
- signalling phosphoinositides.phosphatidylinositol-4-phosphate 5-kinase
- signalling phosphoinositides.phosphoinositide phospholipase C
- signalling phosphorelay
- signalling receptor kinases
- signalling receptor kinases.Catharanthus roseus-like RLK1
- signalling receptor kinases.crinkly like
- signalling receptor kinases.DUF\_26
- signalling receptor kinases.extensin
- signalling receptor kinases.legume-lectin
- signalling receptor kinases.leucine rich repeat I
- signalling receptor kinases.leucine rich repeat II
- signalling receptor kinases.leucine rich repeat III
- signalling receptor kinases.leucine rich repeat IX
- signalling receptor kinases.leucine rich repeat VI
- signalling receptor kinases.leucine rich repeat VII
- signalling receptor kinases.leucine rich repeat VIII.VIII-1
- signalling receptor kinases.leucine rich repeat VIII.VIII-2
- signalling receptor kinases.leucine rich repeat XI
- signalling receptor kinases.leucine rich repeat XII
- signalling receptor kinases.leucine rich repeat XIV
- signalling receptor kinases.lysine motif
- signalling receptor kinases.misc
- signalling receptor kinases.proline extensin like
- signalling receptor kinases.S-locus glycoprotein like
- signalling receptor kinases.thaumatin like
- signalling receptor kinases.well associated kinase
- signalling receptor kinases.wheat LKR10 like
- signalling unspecified

\* Data of log<sub>2</sub> fold change are normalized to visualize all the expression values

## B) Hormone-related pathways

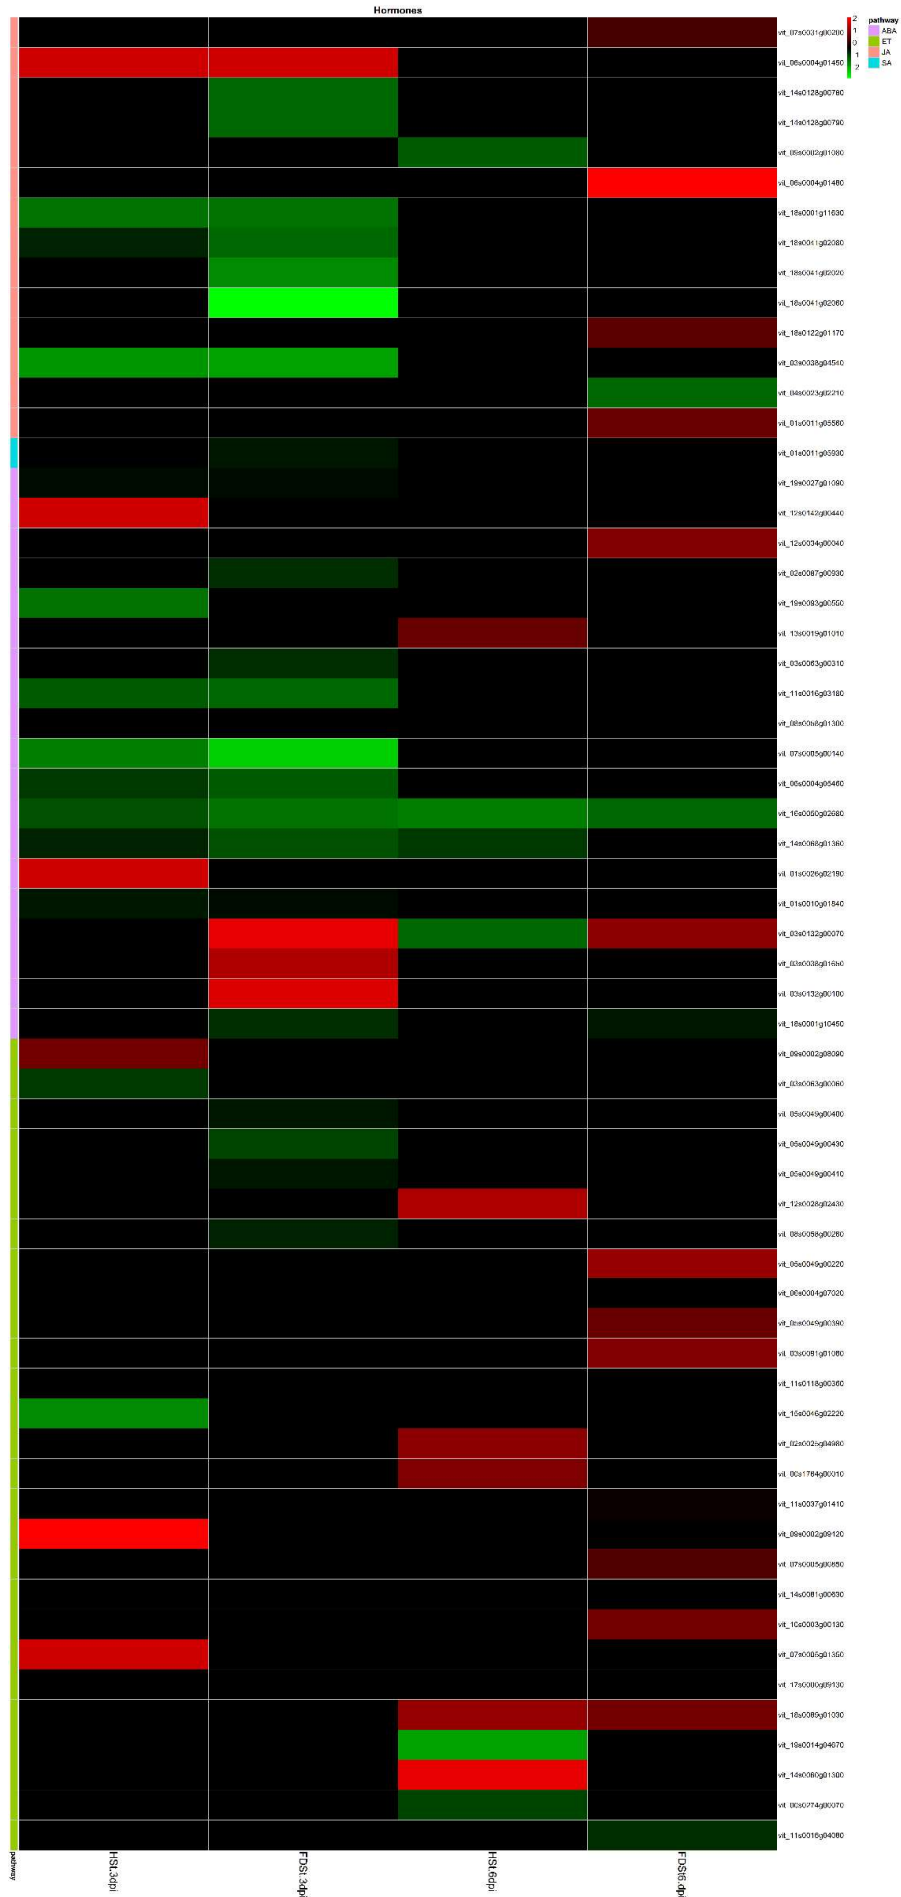

### C) Transcription factors

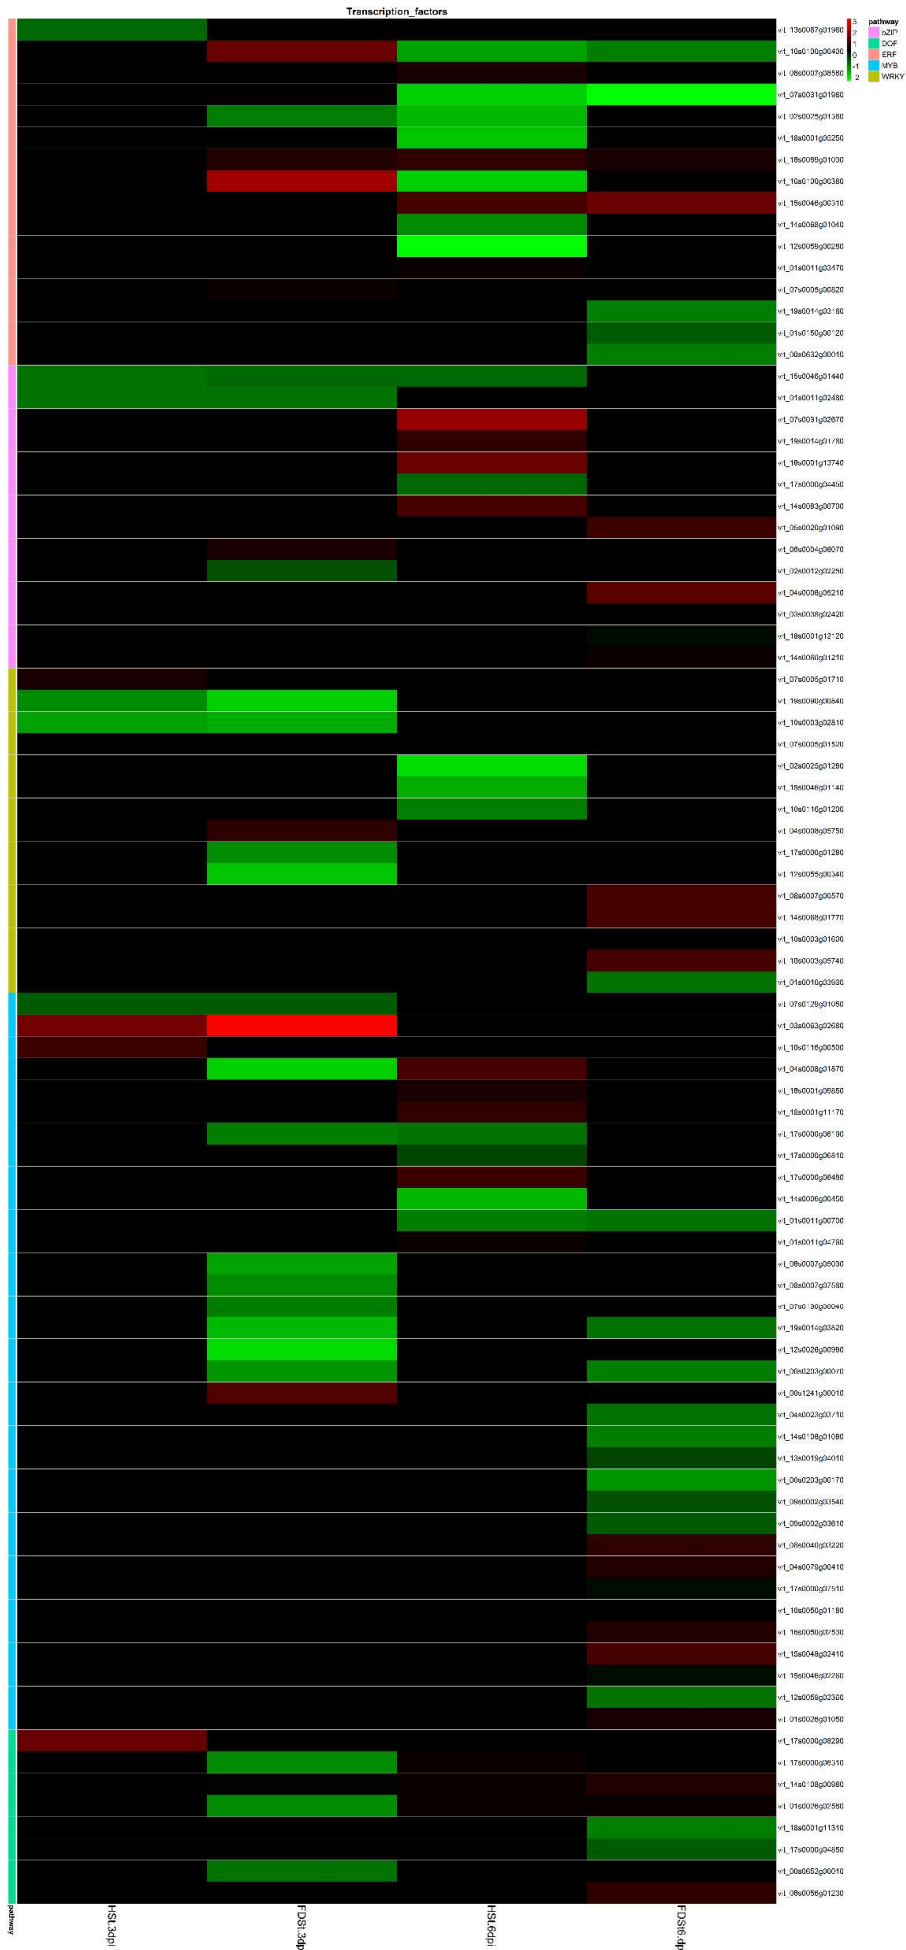

## D) Antioxidant mechanisms

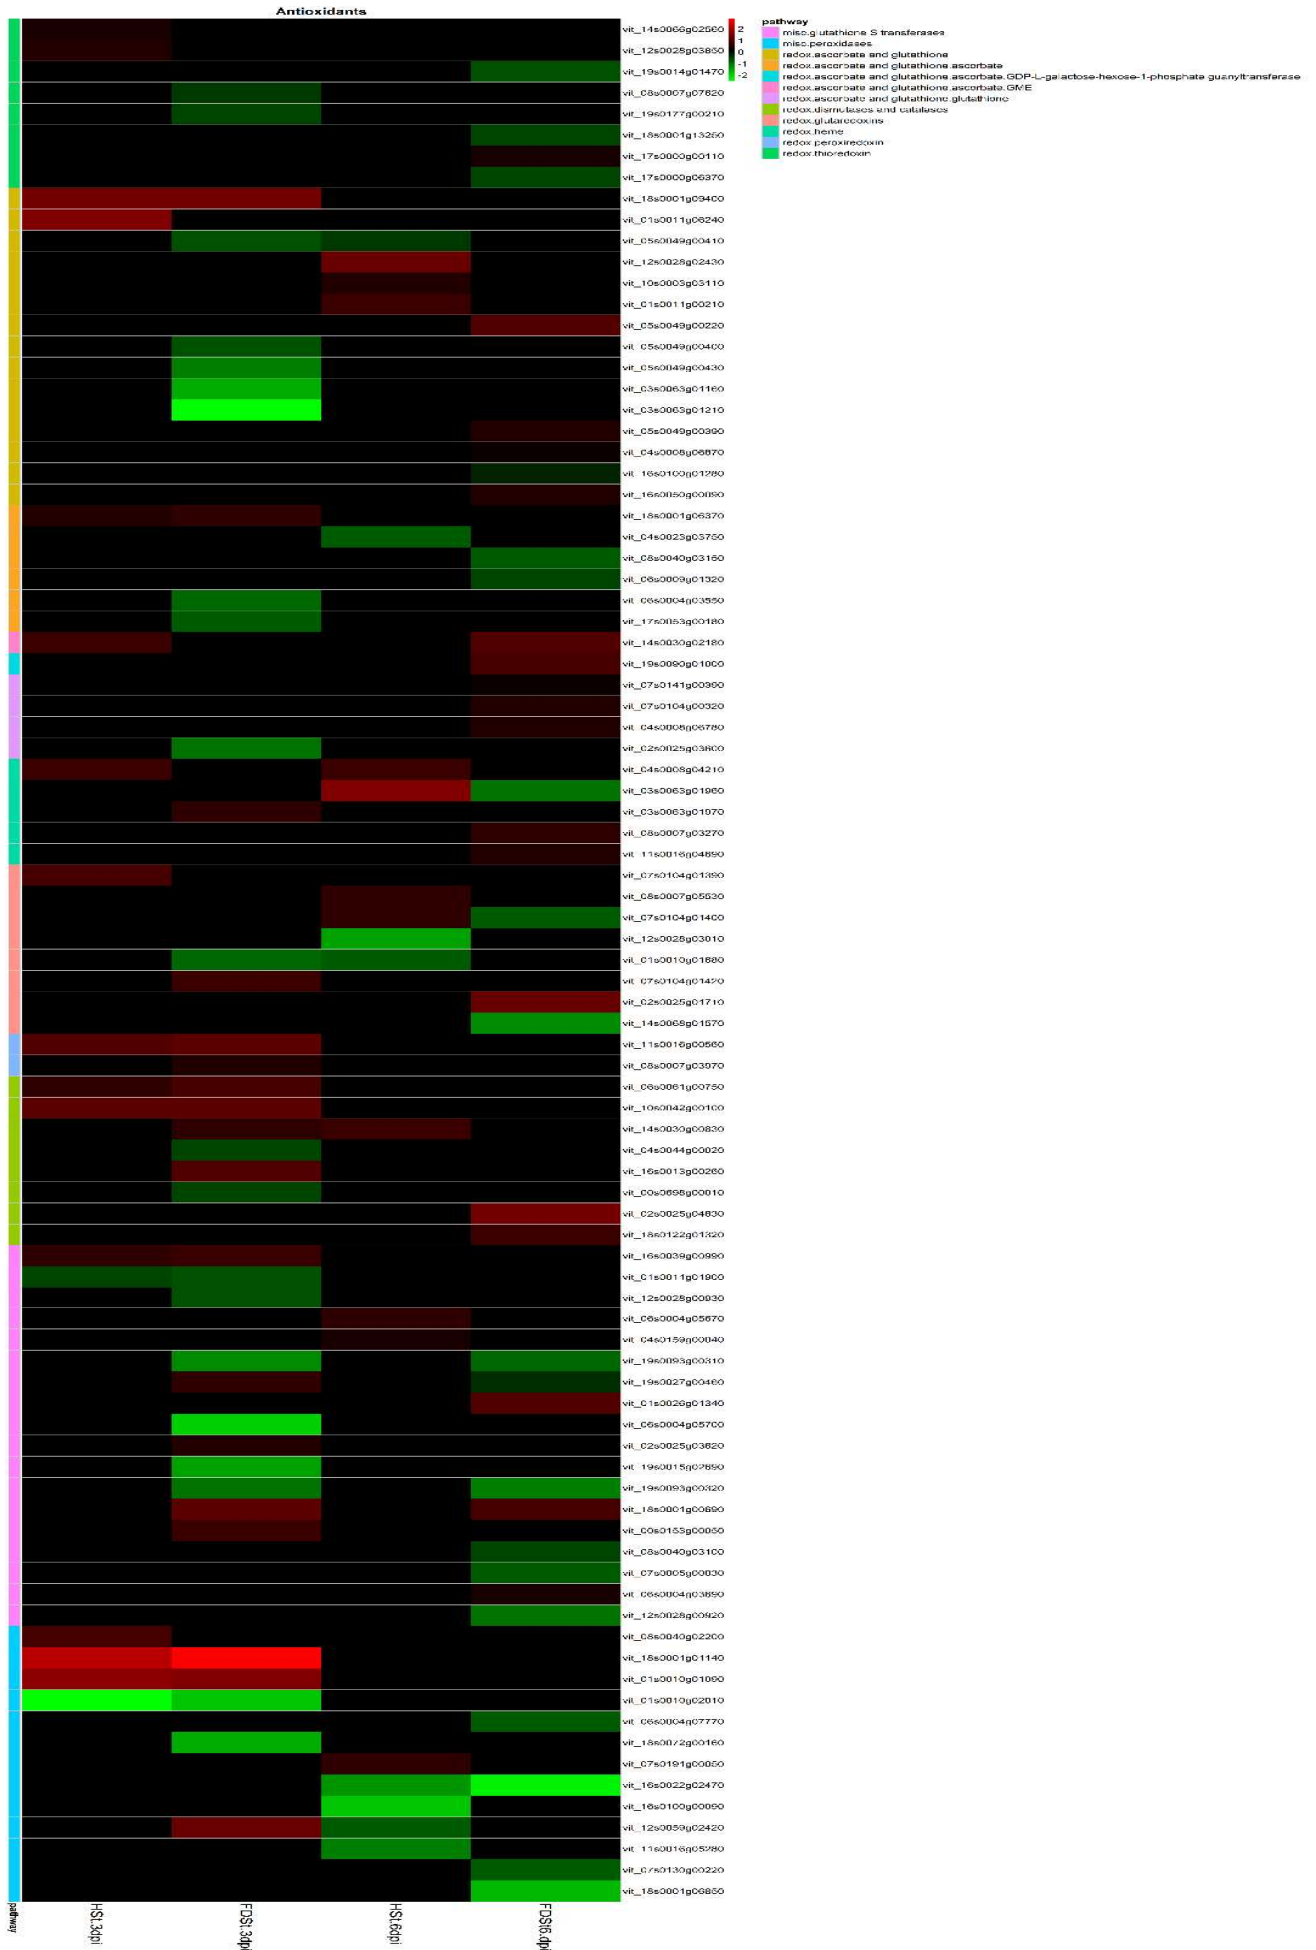

# E) Cell wall

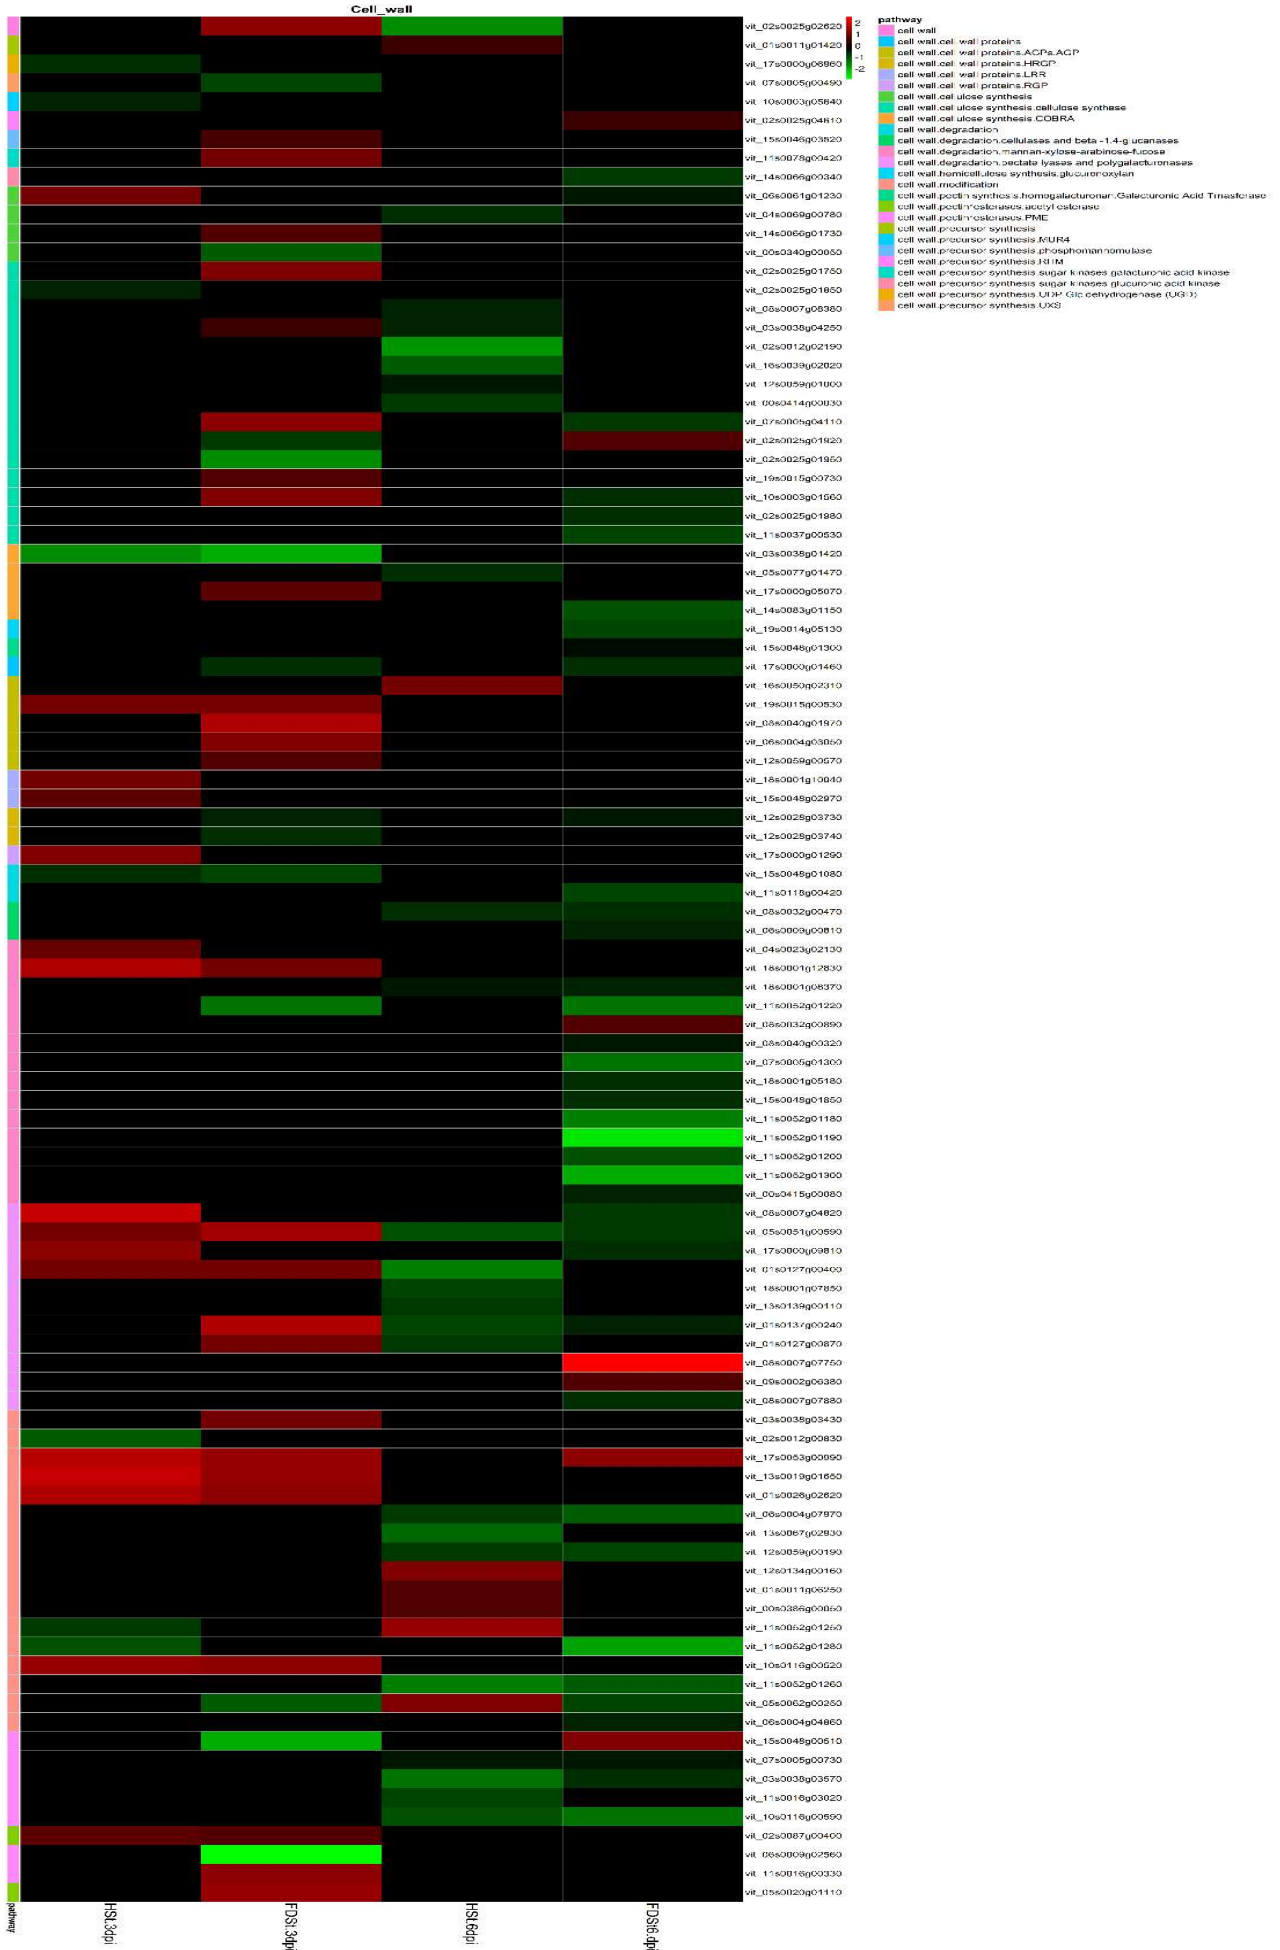

# F) Defense proteins

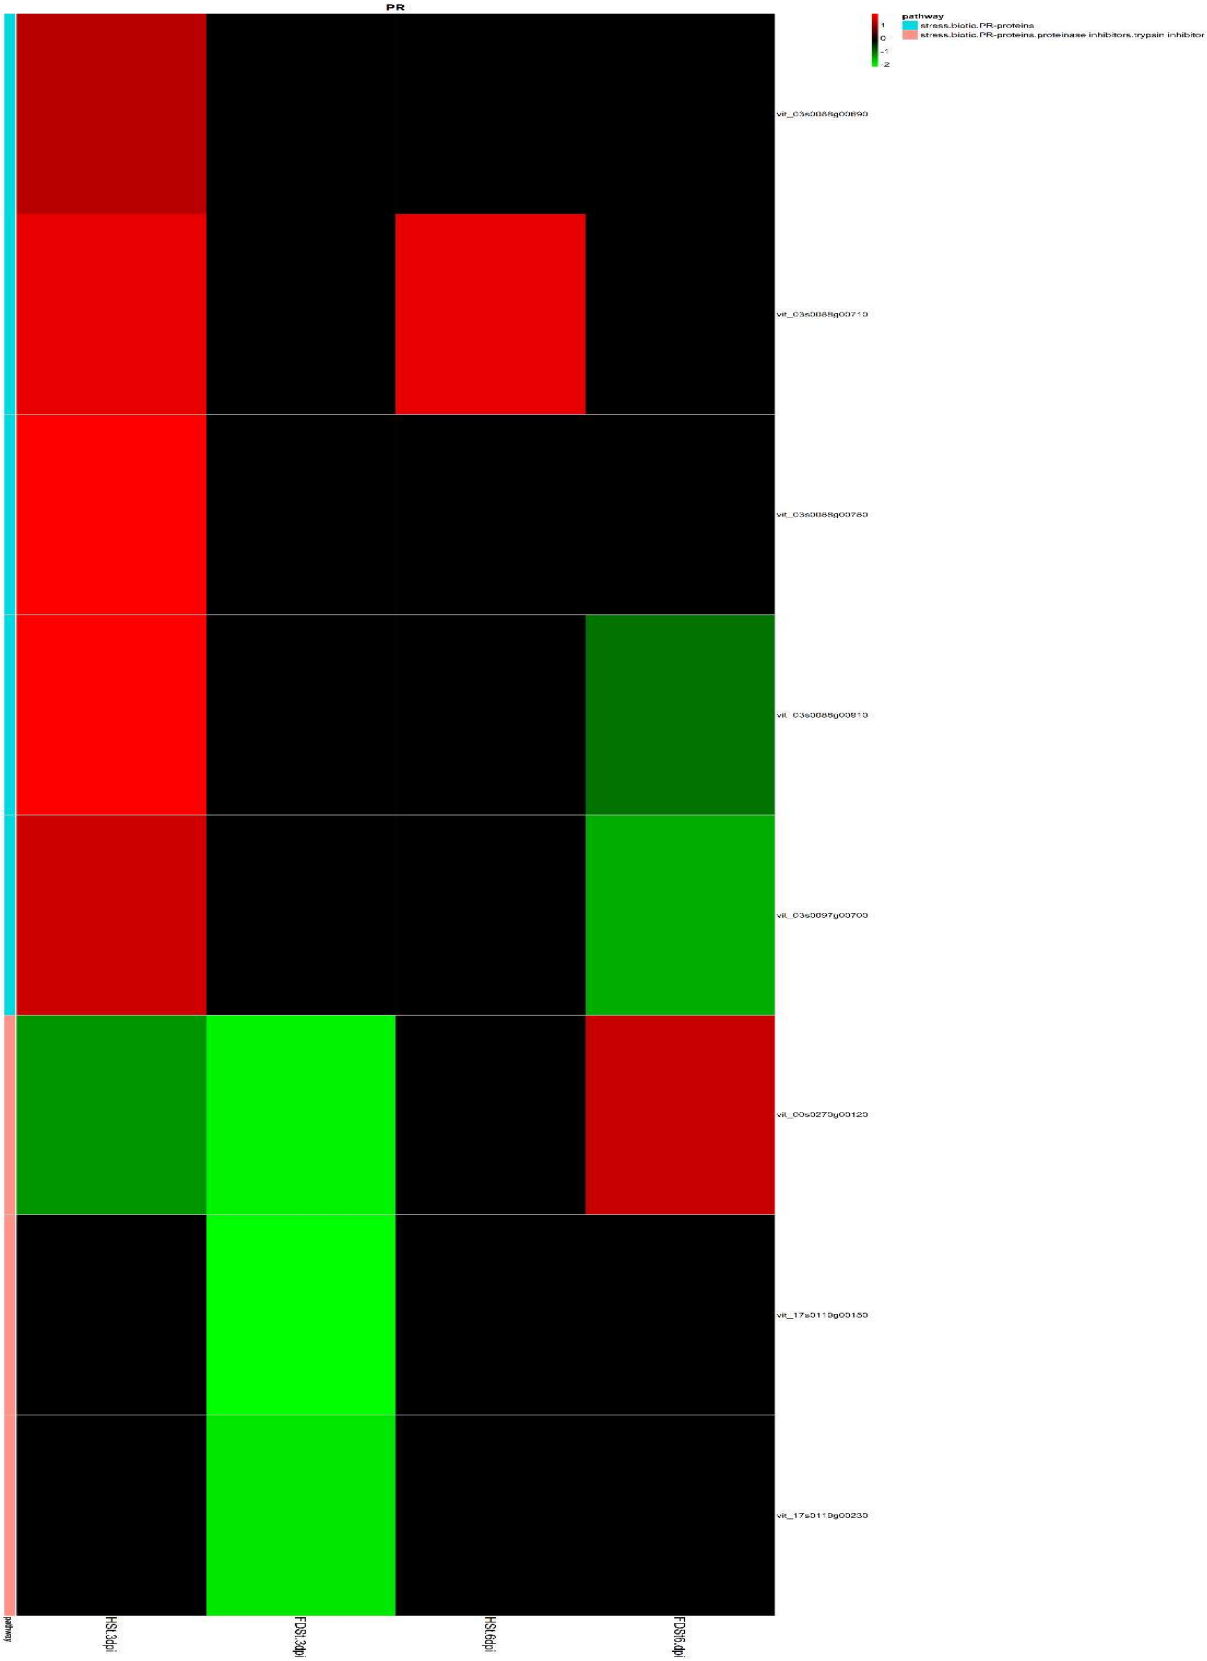

# G) Secondary metabolism

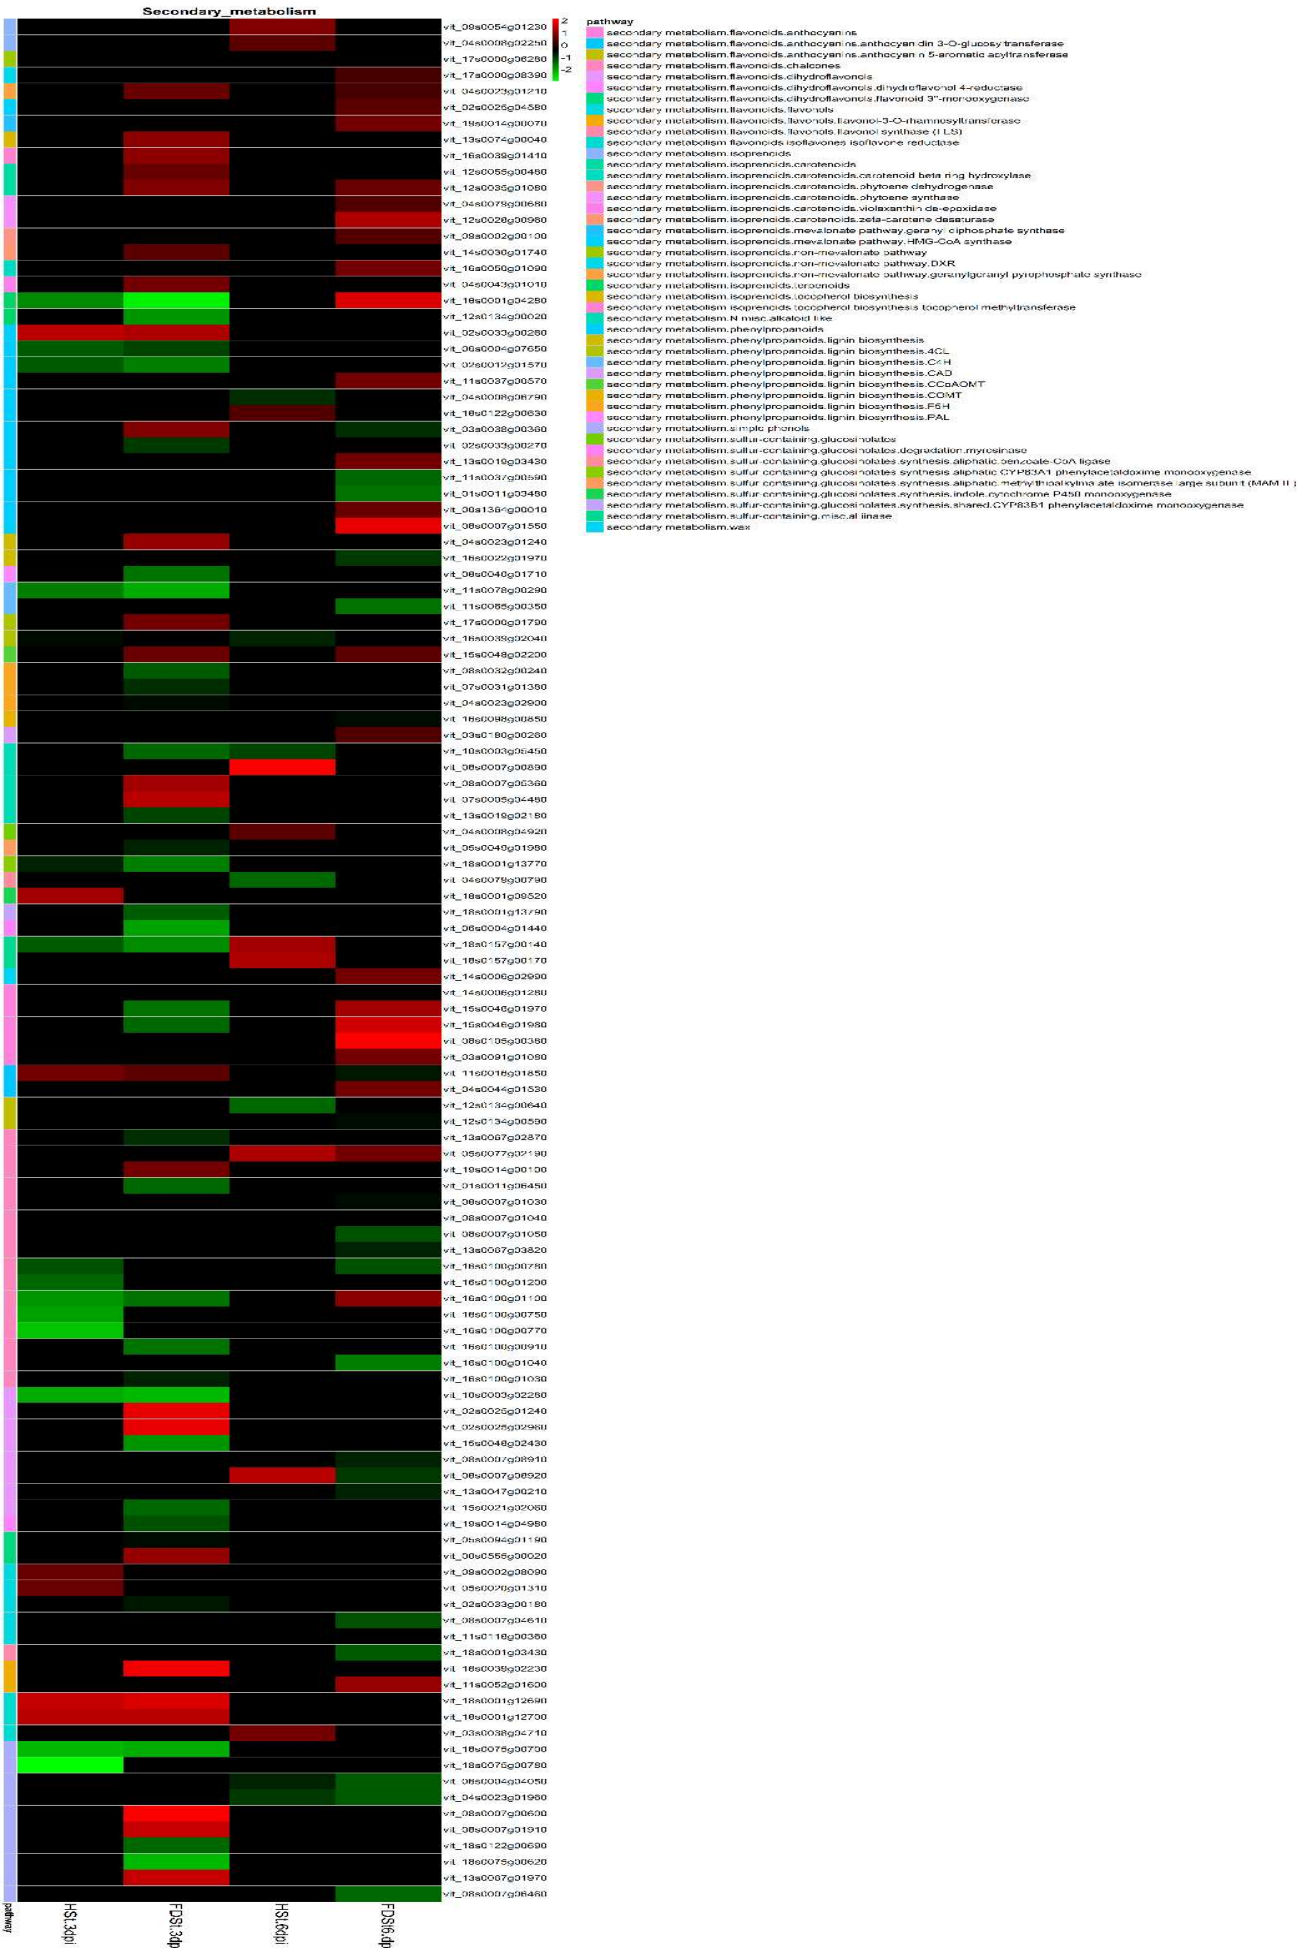

# H) Primary metabolism

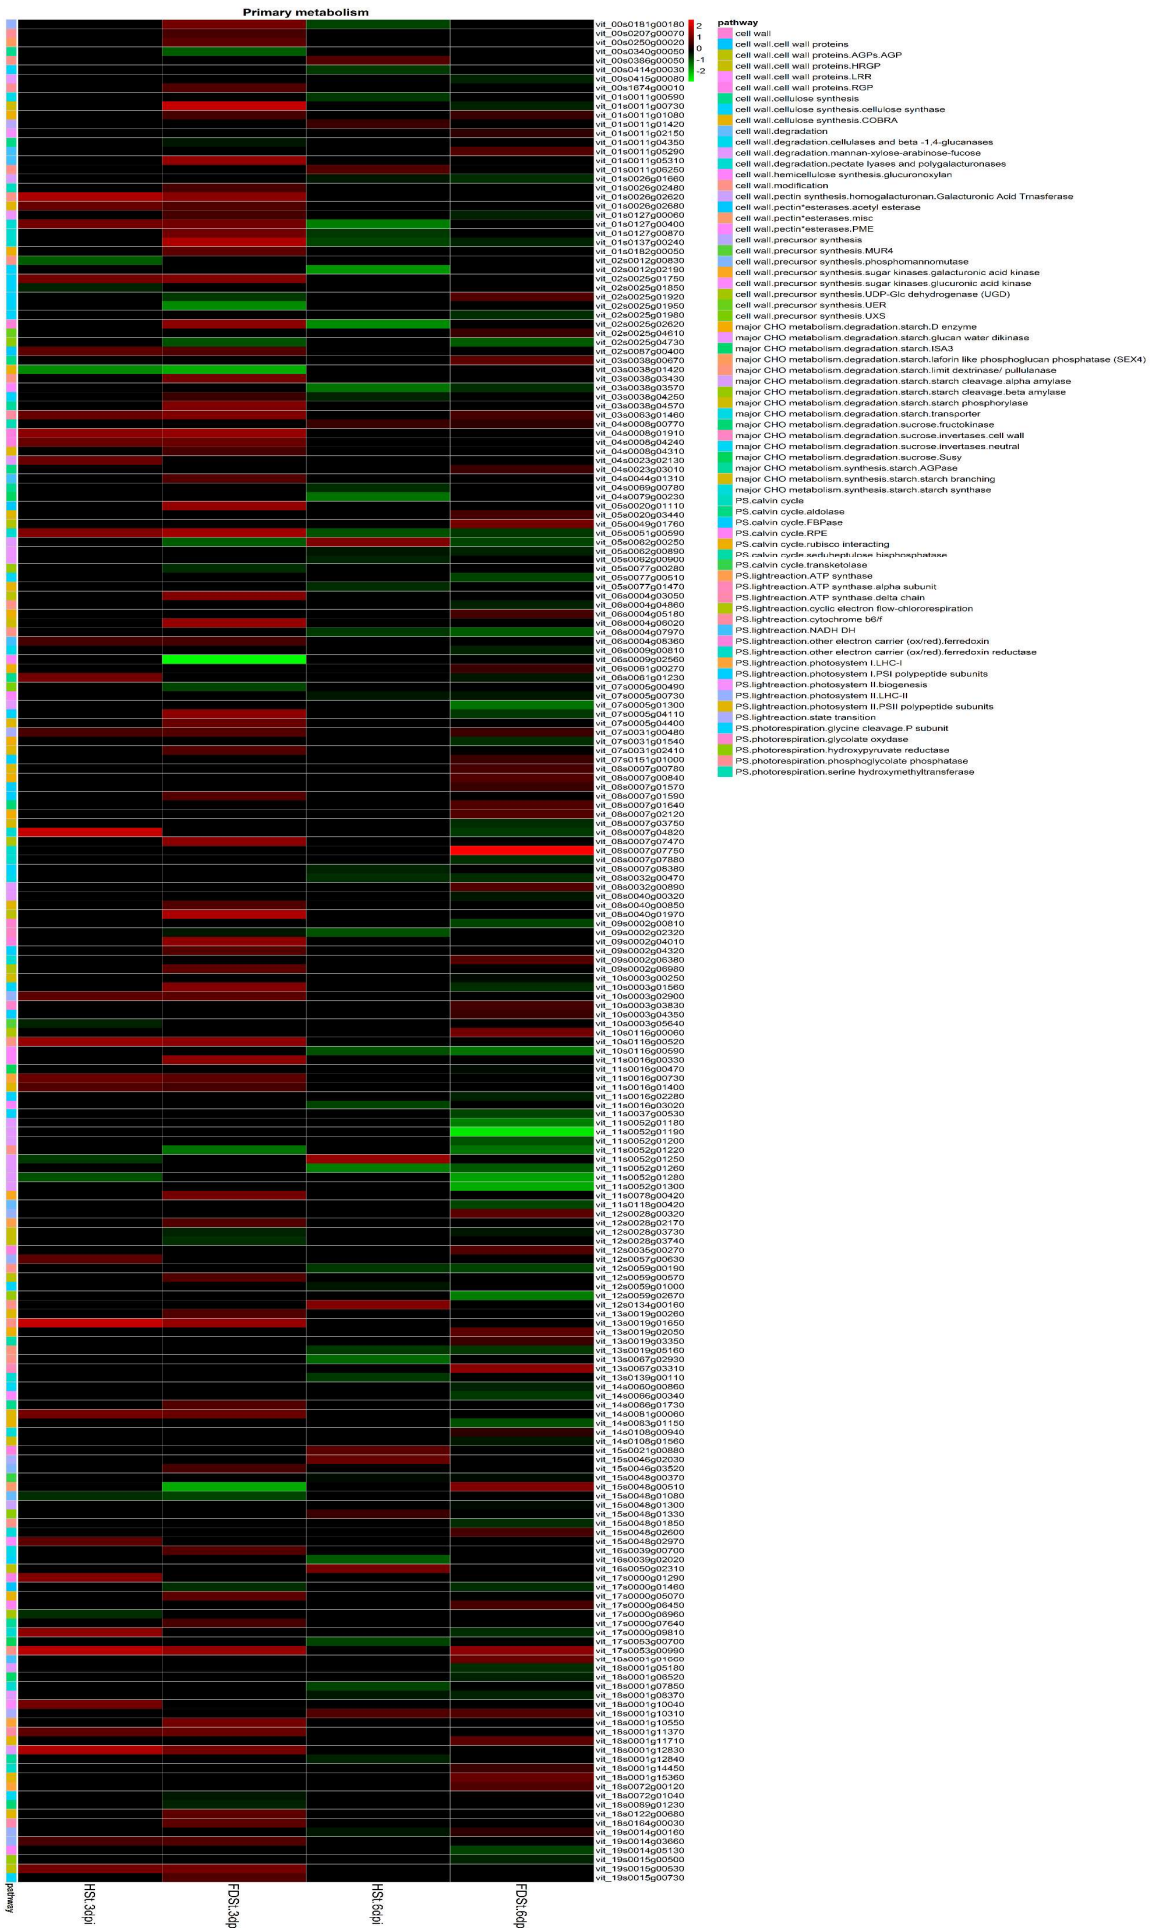

Supplement: 12864_2019_5908_MOESM23_ESM.pdf [file 12864_2019_5908_MOESM23_ESM.pdf]
