# Supplementary material for: Grapevine comparative early transcriptomic profiling suggests that Flavescence dorée phytoplasma represses plant responses induced by vector feeding in susceptible varieties
Source: PubMed Central journal article supplement (PMC6595628; doi:10.1186/s12864-019-5908-6), 2019-06-26

# A) Signaling pathways

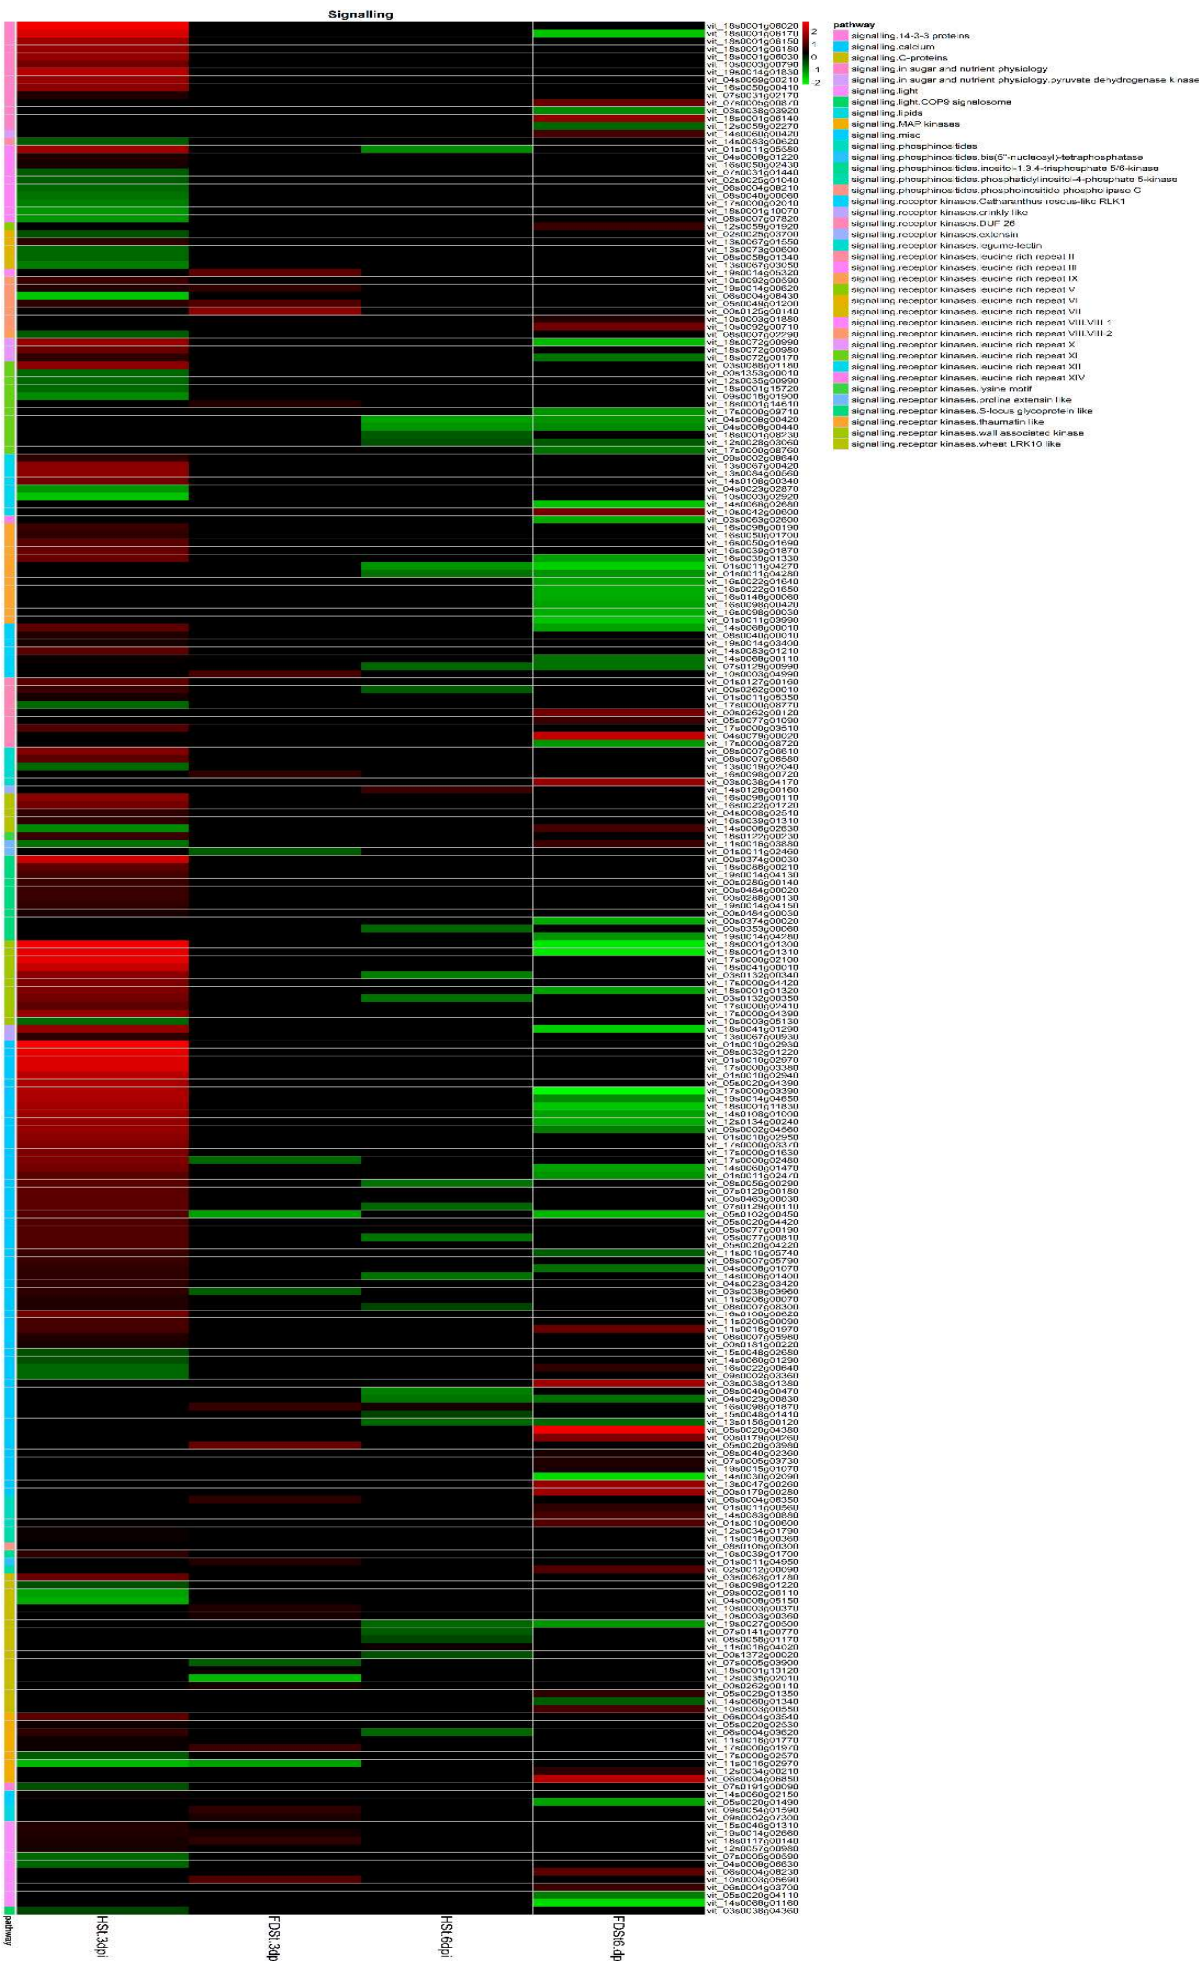

## B) Hormone-related pathways

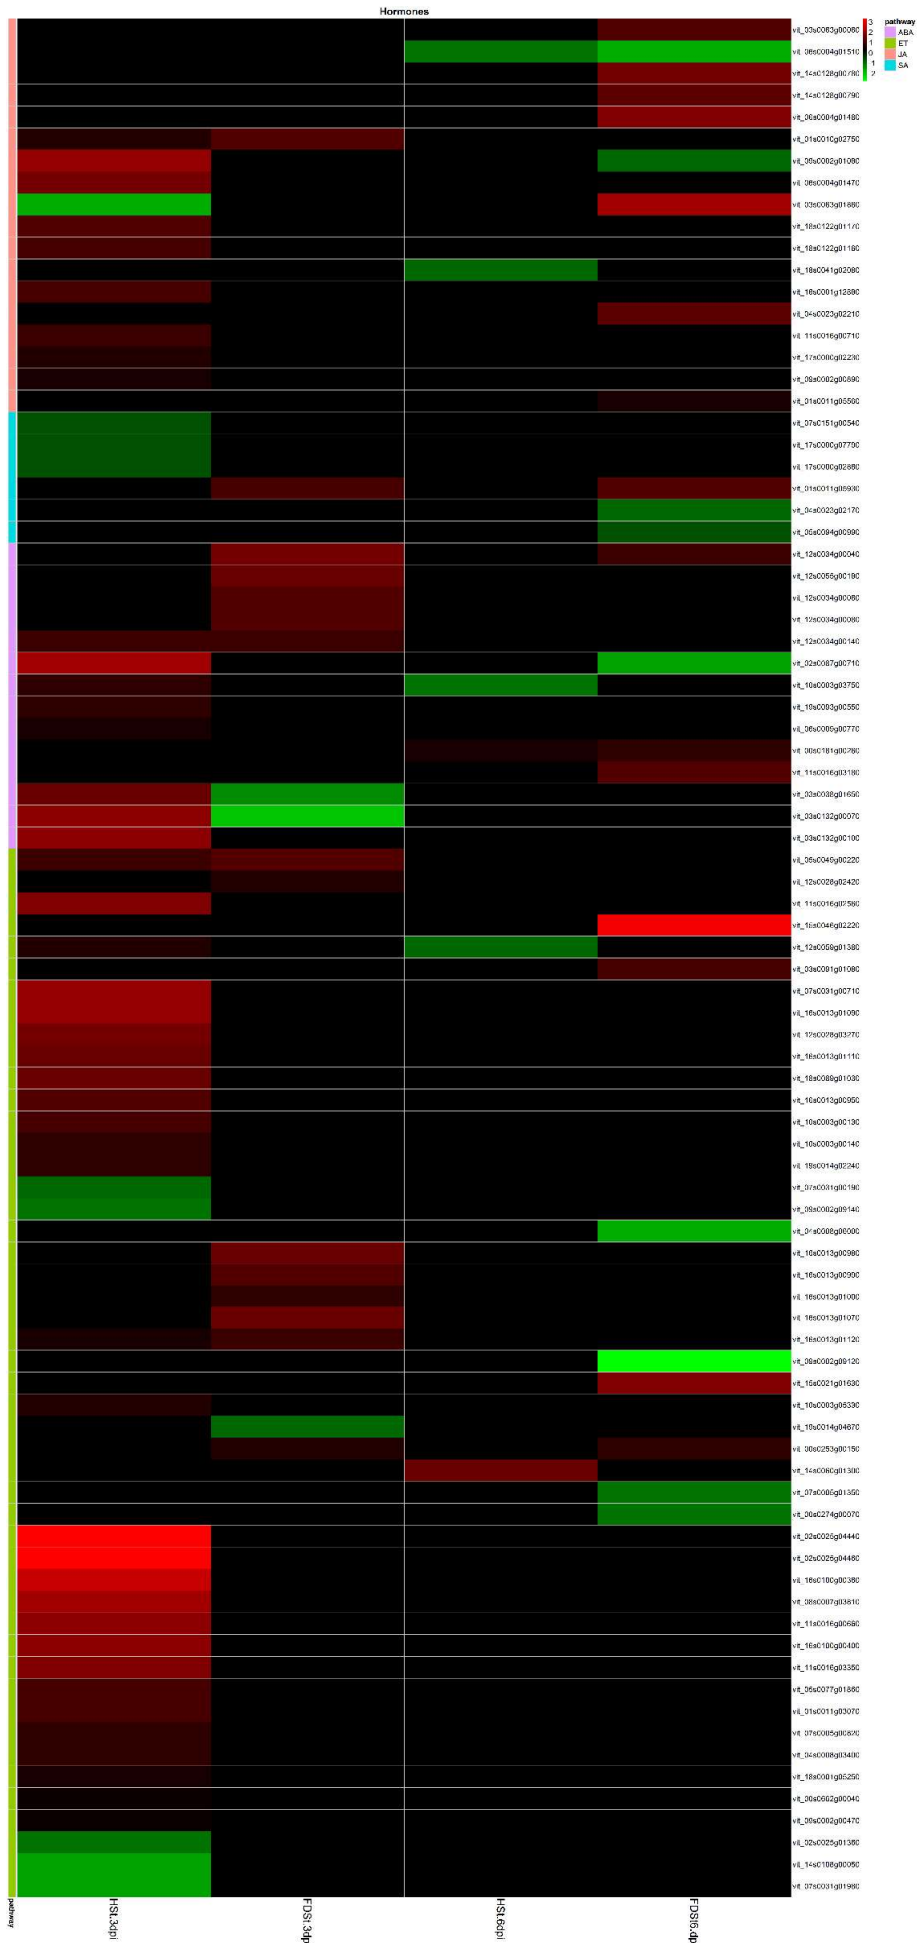

### C) Transcription factors

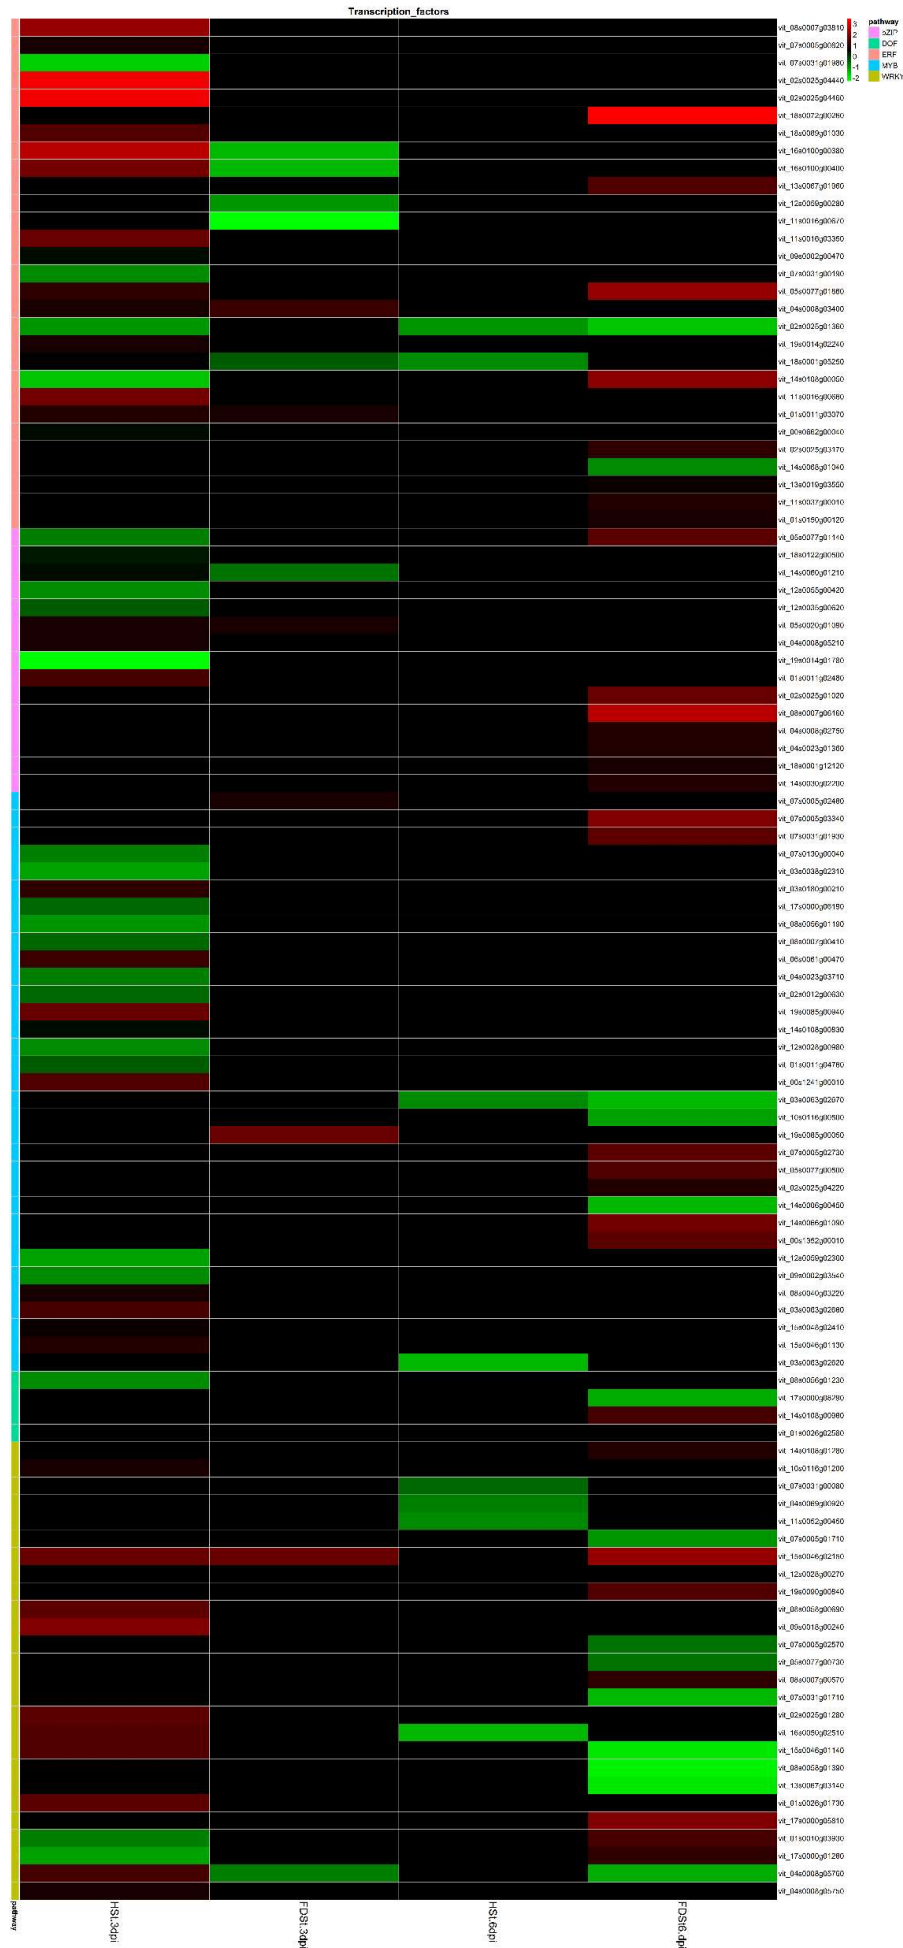

## D) Antioxidant mechanisms

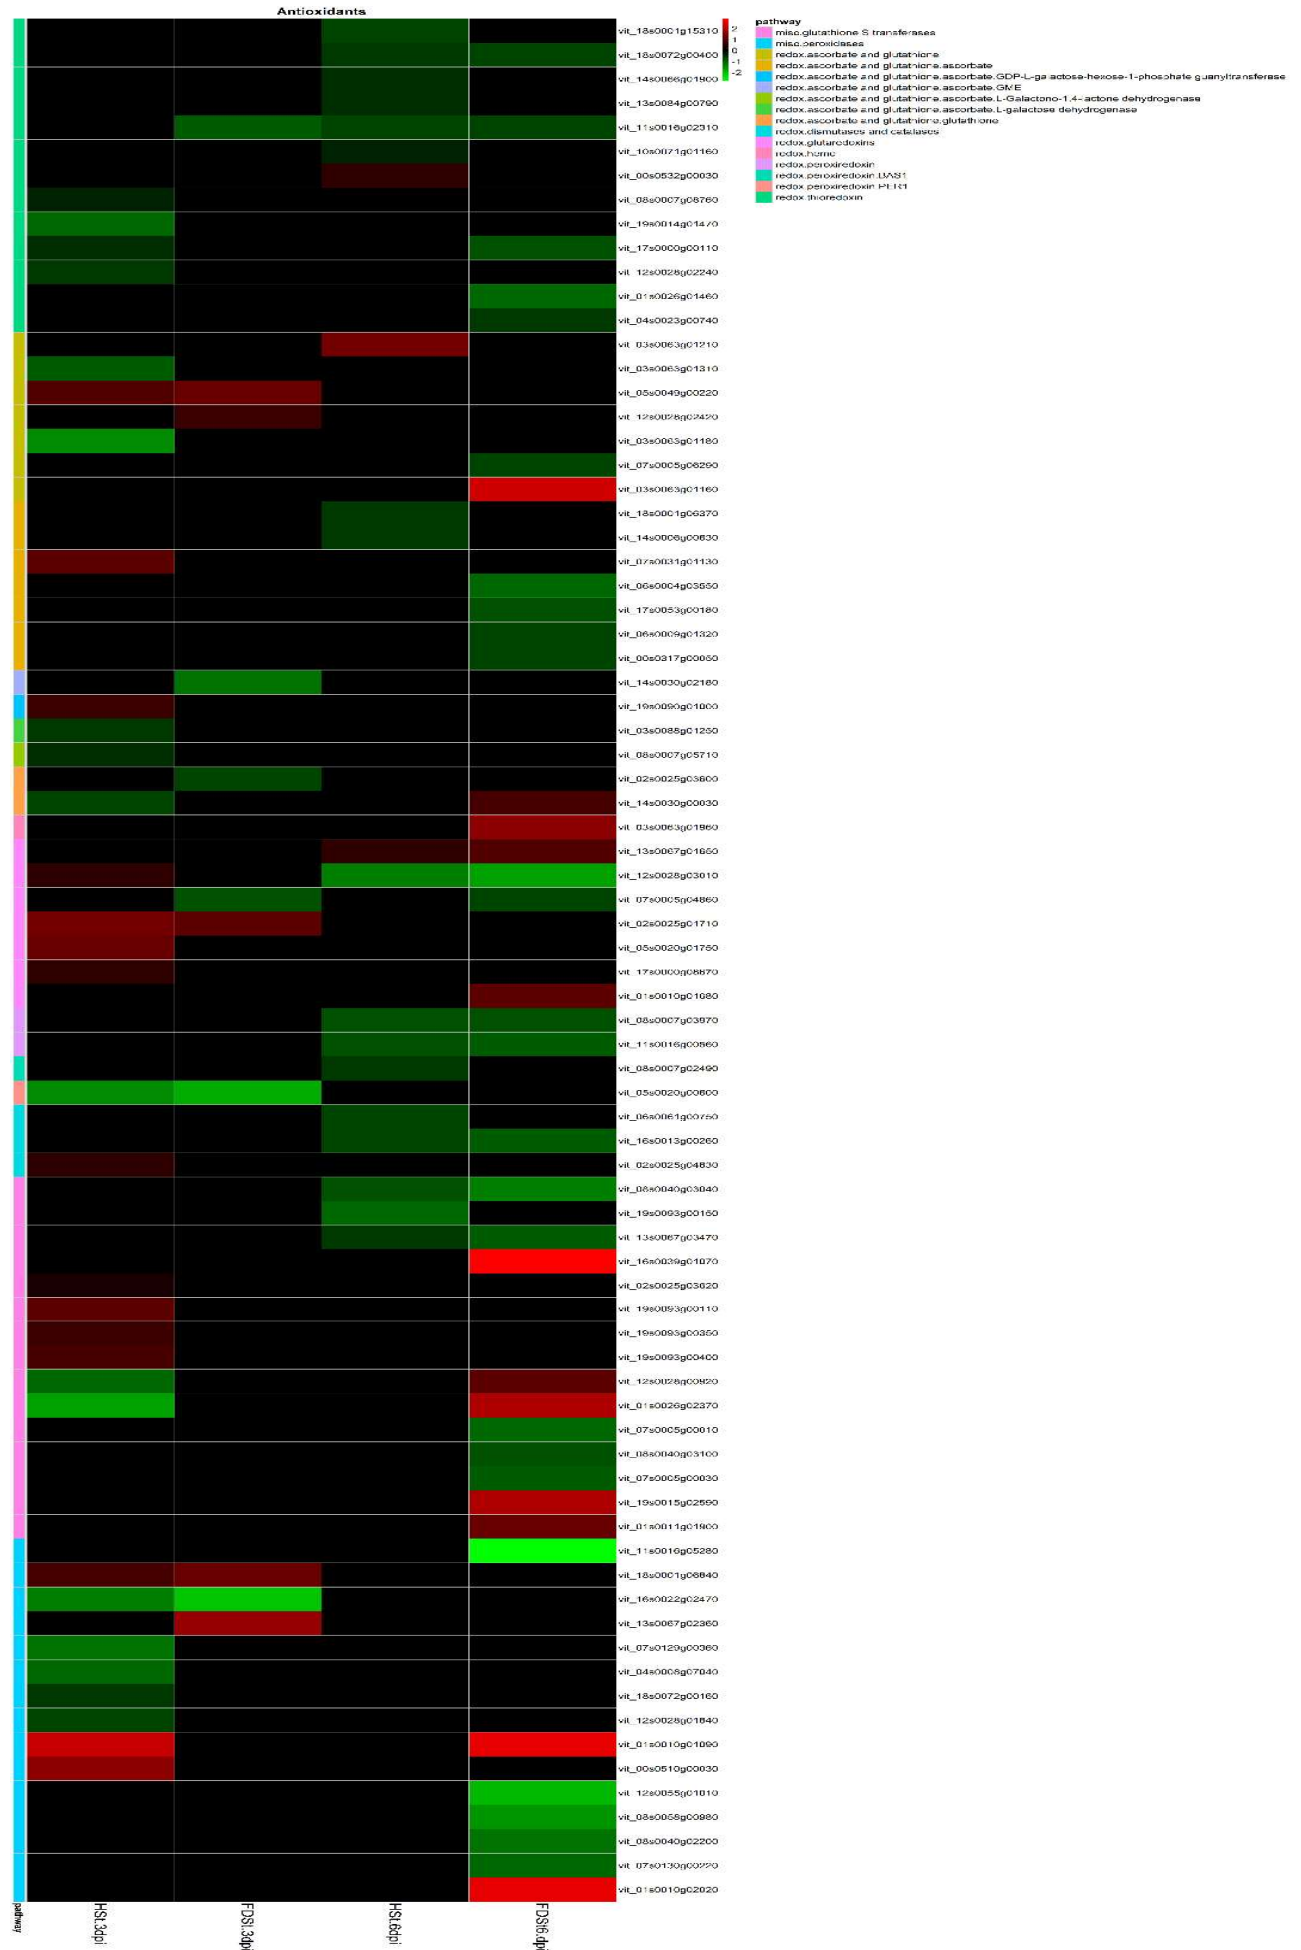

# E) Cell wall

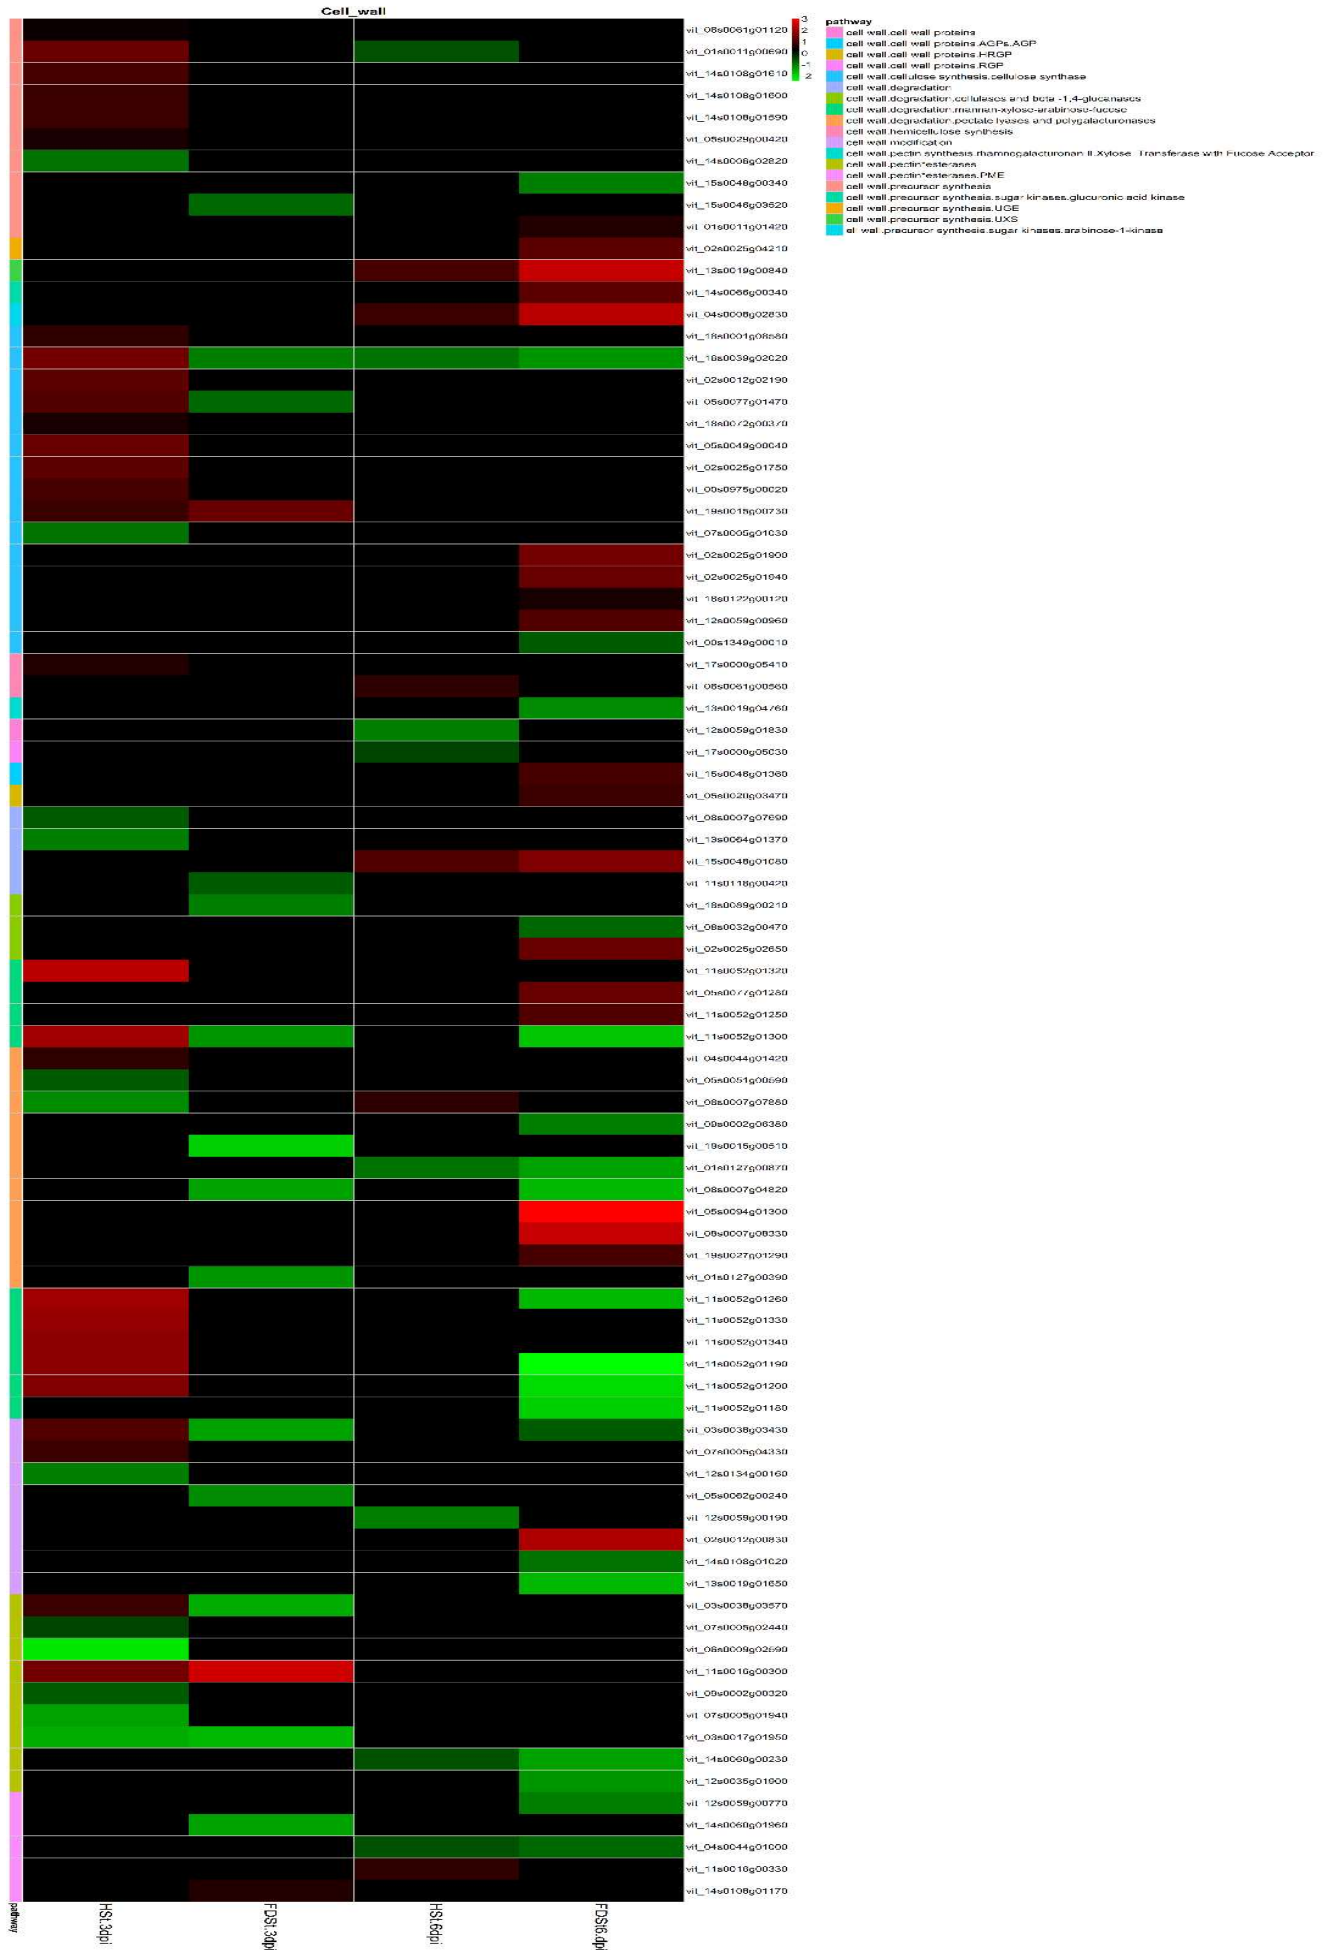

# F) Defense proteins

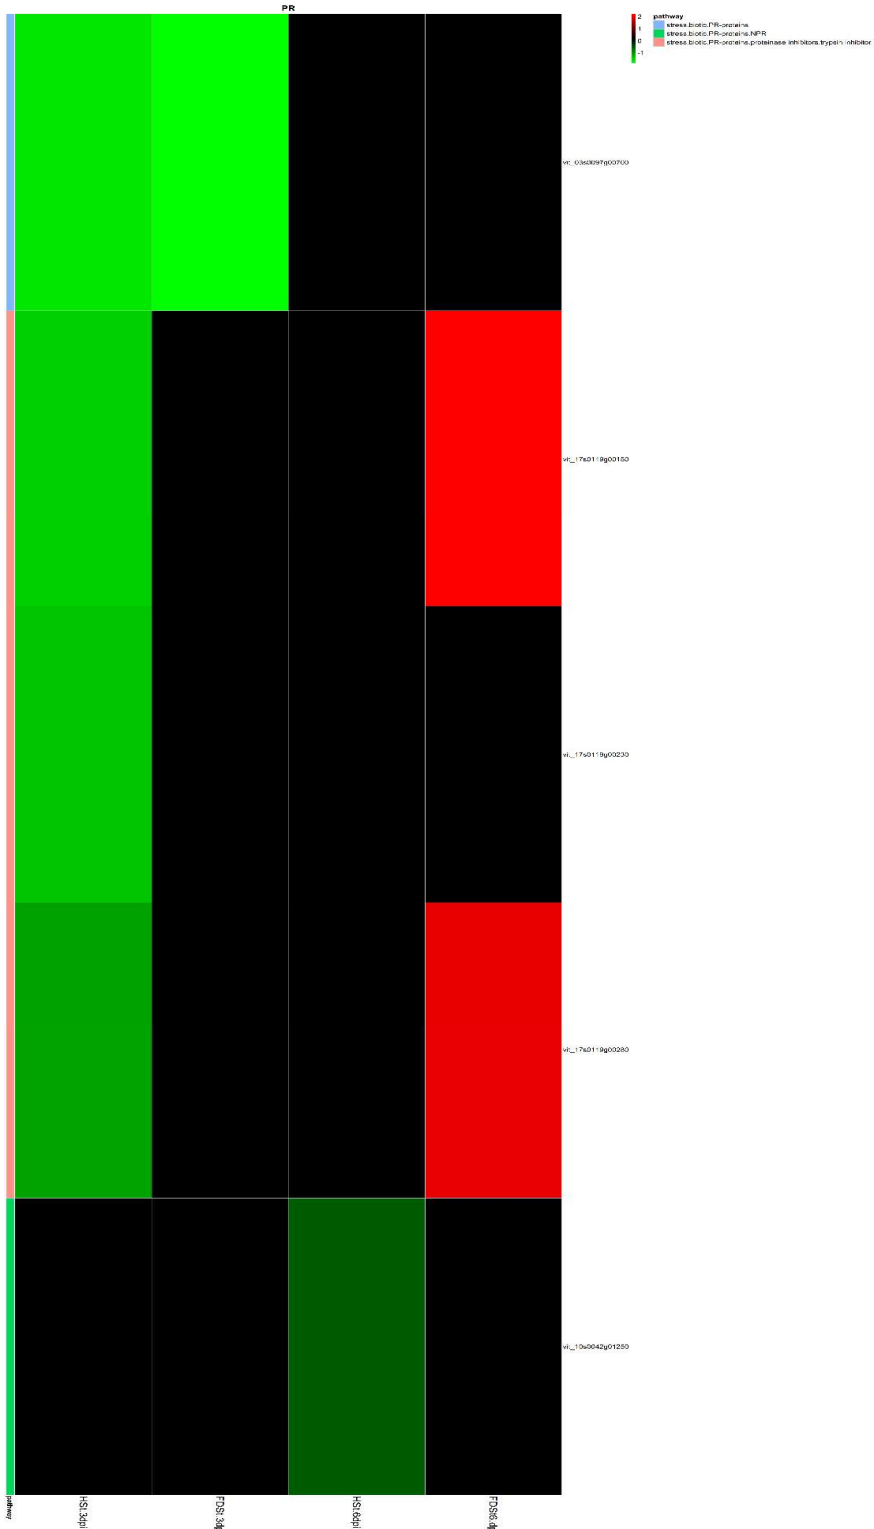

# G) Secondary metabolism

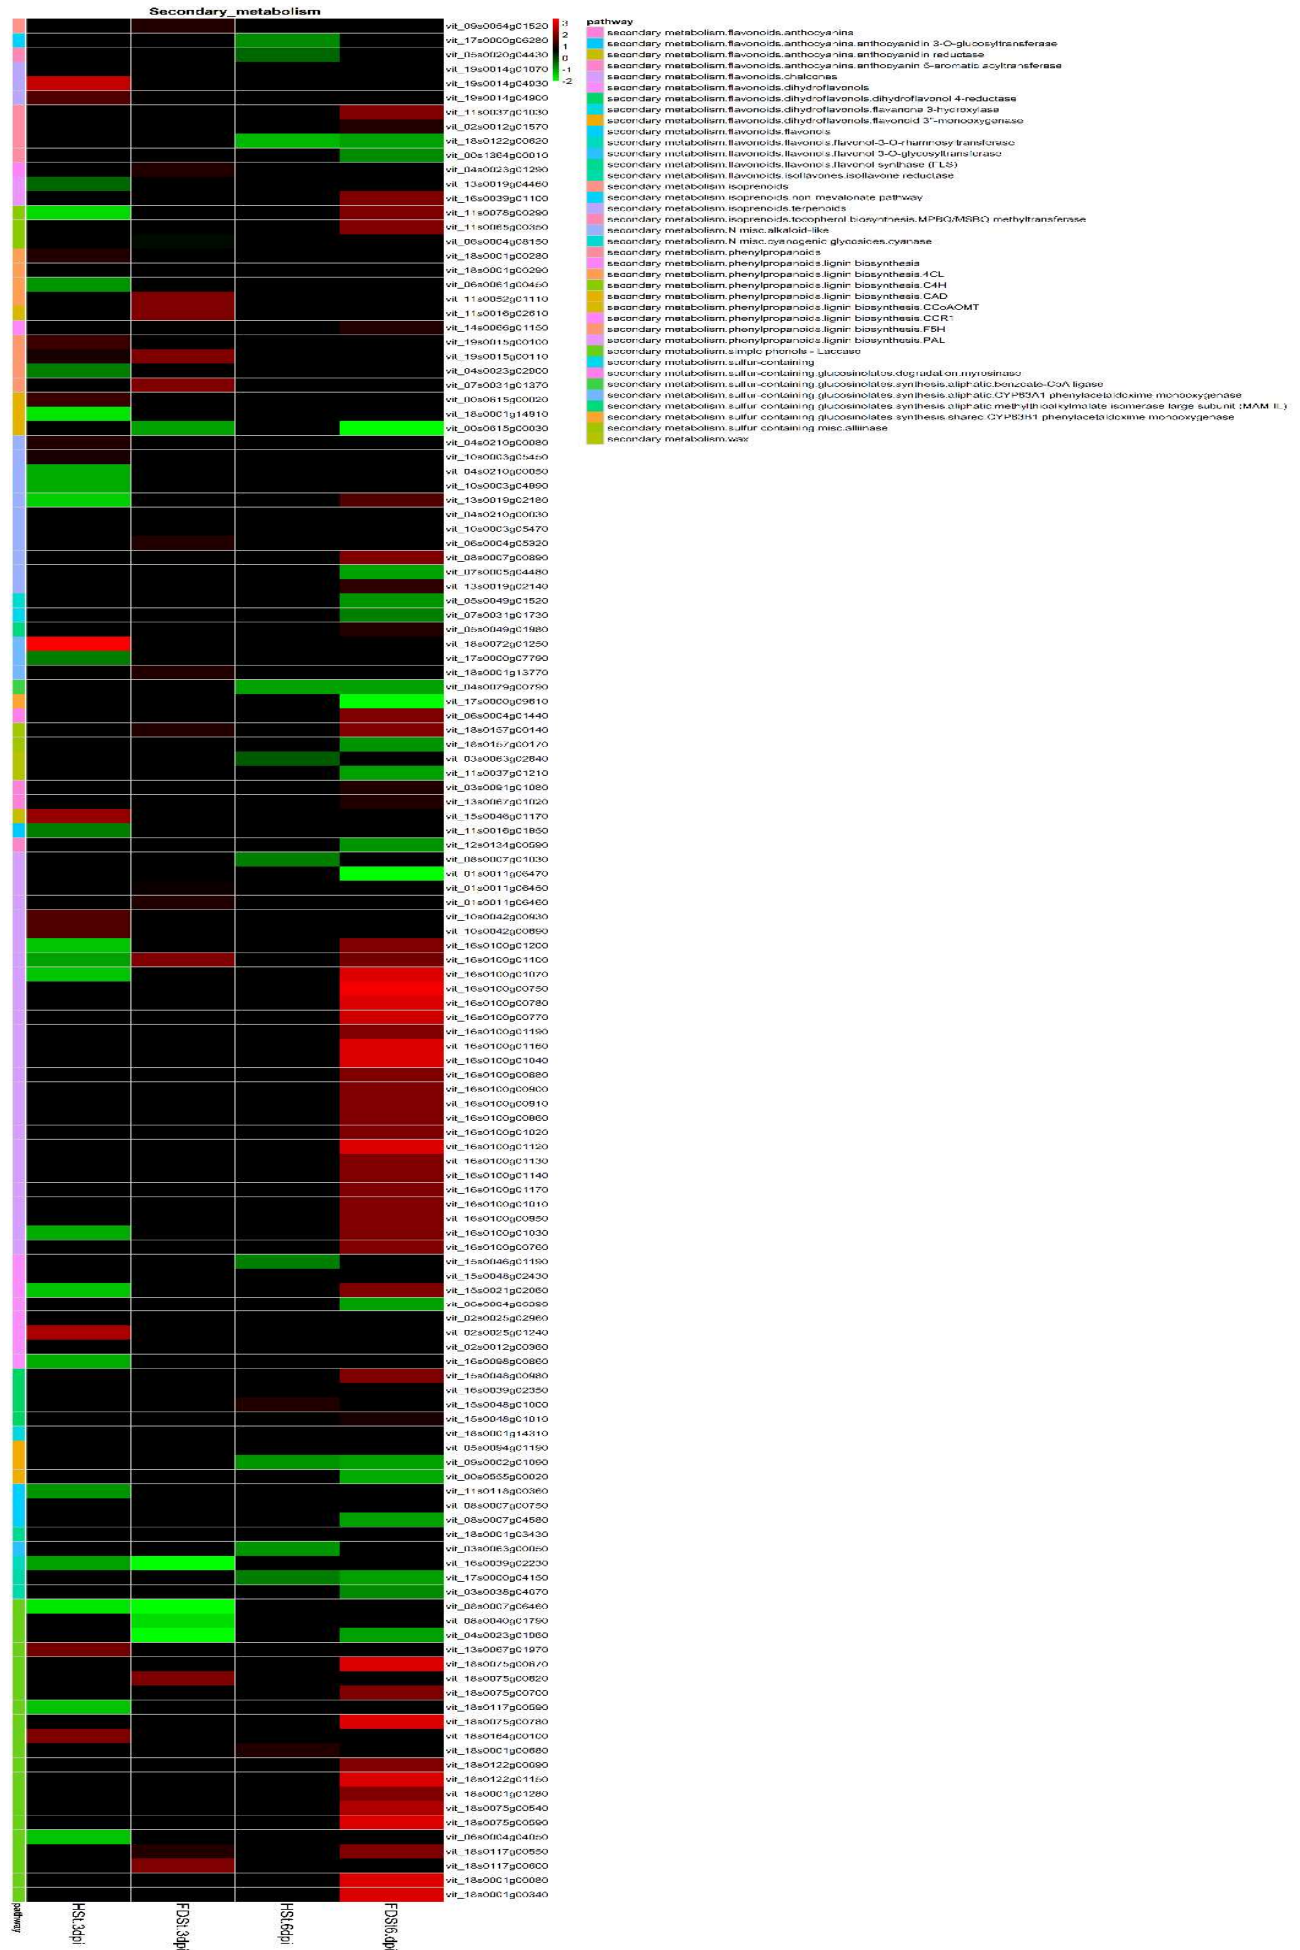

# H) Primary metabolism

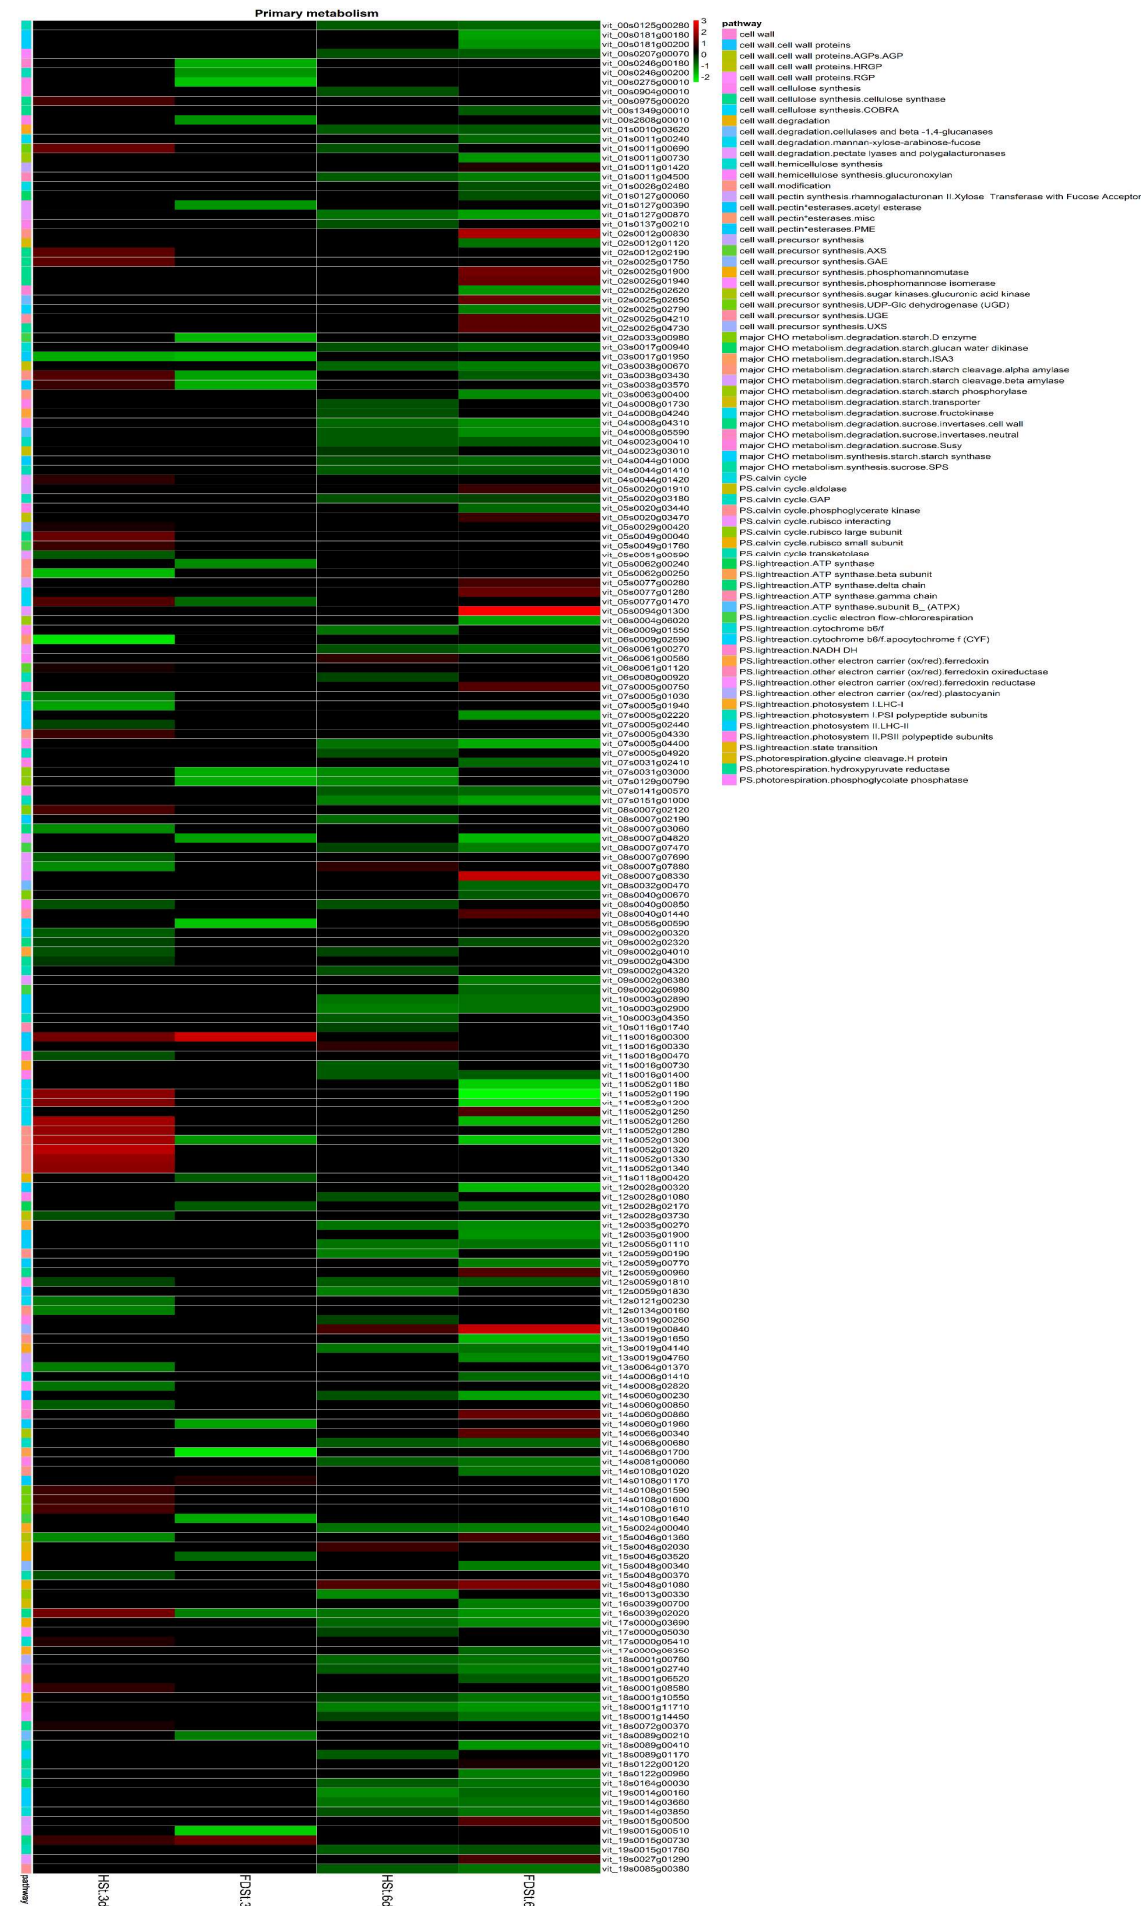

Supplement: 12864_2019_5908_MOESM22_ESM.pdf [file 12864_2019_5908_MOESM22_ESM.pdf]
